## **Astaxanthin extends lifespan via altered biogenesis of the mitochondrial respiratory chain complex III**

Ronit Hoffman<sup>1</sup>, Laure D. Sultan<sup>2</sup>, Ann Saada<sup>3</sup>, Joseph Hirschberg<sup>1</sup>, Oren Osterzsetzer-Biran<sup>2,\*</sup> and Yosef Gruenbaum<sup>1,\*</sup>

<sup>1</sup> Dept. of Genetics, The Alexander Silberman Inst. of Life Sciences, Faculty of Mathematics and Natural Science, The Hebrew University of Jerusalem, Jerusalem 9190401, Israel.

<sup>2</sup> Dept. of Plant and Environmental Sciences, The Alexander Silberman Inst. of Life Sciences, Faculty of Mathematics and Natural Science, The Hebrew University of Jerusalem, Jerusalem 9190401, Israel.

<sup>3</sup> Department of Genetics and Metabolic Diseases, The Monique and Jacques Roboh Department of Genetic Research, Hadassah-Hebrew University Medical Center, Israel; Jerusalem 9112102, Israel.

\* Address correspondence to:

1. Yosef Gruenbaum, PhD, The Hebrew University of Jerusalem, Edmond J. Safra Campus, Givat Ram, Jerusalem, 91904, Israel. Tel. +972-2-658- 5995; Fax, +972-2-658- 6975; *E-mail*, [gru@vms.huji.ac.il](mailto:gru@vms.huji.ac.il)

2. Oren Osterzsetzer-Biran, PhD, The Hebrew University of Jerusalem, Edmond J. Safra Campus, Givat Ram, Jerusalem, 91904, Israel. Tel. +972-2-658-5191; Fax, +972-2-658-5191; *E-mail*, [oren.osterssetzer@mail.huji.ac.il](mailto:oren.osterssetzer@mail.huji.ac.il)

Running title: “Astaxanthin affects mitochondria and life-span”

## Abstract

Astaxanthin is a *keto*-carotenoid produced in some bacteria and algae, which has very important industrial applications (i.e., in cosmetics, coloring additive in aquaculture and as a dietary supplement for human). Here, we analyzed the molecular basis of Astaxanthin-mediated longevity in the model organism, *Caenorhabditis elegans*. The increased lifespan effects of Astaxanthin are restricted in *C. elegans* to the adult phase and are uninfluenced by various other carotenoids tested. Genetic analyses indicated that the Astaxanthin-mediated life-extension relies on mitochondria activity, via the Rieske iron-sulfur polypeptide-1 (ISP-1), but is not influenced by the functions of other known longevity-related gene-loci, including *CLK-1*, *DAF-2*, *DAT-16*, *EAT-2*, *GAS-1* *GLP-1* or *MEV-1*. Biochemical analyses of native respiratory complexes showed that Astaxanthin affects the biogenesis of holo-complex III (and likely supercomplex I+III, as well). Effects on holo-CIII assembly and activity were also indicated by *in-vitro* assays, with mitochondria isolated from worms, rodents, human and plants, which were treated with Astaxanthin. These data indicated a cross-species effect on the oxidative phosphorylation (OXPHOS) machinery by the carotenoid, and provide with further insights into the molecular mechanism of animals longevity extension by Astaxanthin.

Keywords: *Caenorhabditis elegans*, Carotenoids, Astaxanthin, median lifespan; mitochondria, OXPHOS, Complex III, Rieske iron-sulfur protein,

## Significance Statement

Astaxanthin is a widely consumed pigment by animals and human. In this study we find that Astaxanthin, but not other tested carotenoids, significantly extends the lifespan of animals by affecting respiratory complex III (CIII) biogenesis of the mitochondria, in plants, *C. elegans*, rodents and human. We further propose a model to try explaining this effect of astaxanthin on animals' longevity.

## Introduction

The nematode *Caenorhabditis elegans* is a leading model organism for studying the biology of aging, and for identifying new pharmacological targets for extended longevity and the treatment of aging-related diseases in animals (Chen *et al.* 2014). Genetic studies indicated to three major aging-related mechanisms in *C. elegans*. These include the insulin pathway, the dietary restriction system, and the mitochondrial respiration system, which were all shown to affect the lifespan of worms and other animals (Amrit *et al.* 2014, Collins *et al.* 2008). Noteworthy, the majority (>80%) of the *C. elegans* proteome was shown to share homology with known human genes (Henricson *et al.* 2004, Lai *et al.* 2000), thus suggesting common aging-related mechanisms between *C. elegans* and human.

Among the key factors that affect longevity in worms is oxidative damage, generated by reactive oxygen species (ROS). Induced ROS level was shown to induce early aging in various animals and plants (Paital *et al.* 2016, Singh *et al.* 2016). Consequently, strong antioxidants as resveratrol, coenzyme Q10 (ubiquinol or 2,3-dimethoxy-5-methyl-6-decaprenyl benzoquinone) and carotenoids as Astaxanthin can extend the lifespan of *C. elegans*, presumably by scavenging ROS and lowering the levels of oxidative stress (Chen, *et al.* 2014). Carotenoids comprise a large class of natural antioxidant pigments that are synthesized and accumulate in photosynthetic organisms, various bacteria and some fungi (Cazzonelli 2011, Rodriguez-Concepcion *et al.* 2018). These isoprenoid compounds are also essential components of the photosynthetic machinery, and are associated with anti-oxidative reactions in bacteria, fungi, algae and plants. In animals, carotenoids that are consumed from the food play important roles in the antioxidant defense mechanism (Fiedor and Burda 2014).

Astaxanthin (i.e., 3,3-dihydroxy- $\beta,\beta$ -carotene-4,4-dione) is an orange-red pigment containing 13 conjugated double bonds (Supplementary Fig. S1). As other carotenoids, Astaxanthin is a lipid-soluble pigment, which has self-limited absorption orally, with no known toxic syndromes (Barros *et al.* 2014). Astaxanthin is naturally produced by some marine bacteria, algae and plants. Many red-colored marine animals (e.g., salmon, shrimps) and a few bird species (e.g., flamingo) obtain the Astaxanthin orally, through the food chain (Ambati *et al.* 2014). As a strong antioxidant, Astaxanthin was utilized as a common antioxidant agent and as a dietary supplement, intended for human, animal and aquaculture consumption. Astaxanthin has been implicated in numerous health benefits in humans, including reduction in cardiovascular diseases, enhancement of the immune response and reduction in the occurrence of various cancers. (Ames 2018, Zhang and Wang 2015, Zhang *et al.* 2016). Astaxanthin is

obtained industrially by either chemical synthesis or by extraction from algae or bacteria, both of which are approved by the U.S. Food and Drug Administration as food, feed or coloring additives (Raposo *et al.* 2015, Zhang and Wang 2015). Plant-derived Astaxanthin is generally recognized as safe by the FDA, meaning it can be sold as a dietary supplement (Zhang and Wang 2015), although in the United States is restricted to be used only as a colorant agent to animal feed. Currently, there is great interest around Astaxanthin due to its biochemical characteristics, mainly as a potent antioxidant, which is approximately 10 times more effective than  $\beta$ -carotene or lutein and about 100 times than  $\alpha$ -tocopherol (Higuera-Ciapara *et al.* 2006, Rao *et al.* 2015). These studies further suggest that Astaxanthin affects cellular metabolism and protects against fatty acid oxidation.

Astaxanthin was previously shown to extend the lifespan of both flies and worms. *Drosophila melanogaster* mutants in CuZn-superoxide dismutase (SOD1) and Mn-superoxide dismutase (SOD2), as well as mutant-lines with reduced levels of SOD1, SOD2 and catalase, show significant lifespan extension and amelioration of age-related decline in motility when are fed with *Haematococcus pluvialis* (a microalga which accumulates high-levels of Astaxanthin) (Huangfu *et al.* 2013). Likewise, feeding *C. elegans* with Astaxanthin also extends the mean lifespans of both wild-type and long-lived mutant *age-1* animals (Kashima *et al.* 2012, Yazaki *et al.* 2011). The molecular basis of astaxanthin-mediated longevity effects seen in both *D. melanogaster* and *C. elegans* remained unknown, but it was anticipated to be mediated through the scavenging of reactive oxygen species (ROS) produced in these animals by the carotenoid compound.

In this study we show that the lifespan of *C. elegans* fed with Astaxanthin increases by about 20%, which is in accordance with previously published data showing the effects of Astaxanthin on the mean lifespans of the worms (Liu *et al.* 2016). Our data further indicate that the effects of Astaxanthin are independent of the insulin/IGF or dietary restriction of germline pathways, and provide with evidence that the extended longevity effects on *C. elegans* is mediated by the disassembly or altered biogenesis of the native respiratory complexes III<sub>2</sub> and presumably the supercomplex I+III<sub>2</sub>. The effects of Astaxanthin on the mitochondrial OXPHOS system seems universal, as was also apparent by ‘*in-organello*’ assays with mitochondria preparations from plant, *C. elegans*, mice rat and human. These results are of great importance as they offer with novel insights into the molecular basis of longevity extension by Astaxanthin, and may also lead to developing new generation of drugs based on carotenoids to prolong lifespan in animals and human.

## Materials and Methods

### *C. elegans* strains

*C. elegans* strains maintenance was performed under standard conditions, essentially as described (Brenner 1974). N2 (Wild-type), *daf-2*(e1370), *daf-16*(mu86), *glp-1*(or178), *eat-2*(ad1116), *clk-1*(e2519), *mev-1*(kn1), *gas-1*(fc21) and *isp-1*(qm150) strains were used in this study. All strains were obtained from the *C. elegans* Genome Center (CGC) and were out-crossed with wild-type (N2) animals.

### Lifespan assays

Lifespan assays were performed essentially as described previously (Bar *et al.* 2016). Synchronized *C. elegans* animals were grown on NGM (K<sub>2</sub>HPO<sub>4</sub>, KH<sub>2</sub>PO<sub>4</sub>, NaCl, Bacto peptone, Agar, Agarose, MgSO<sub>4</sub>, CaCl<sub>2</sub>, and Cholesterol) plates containing one of the following bacterial strains: Wild type *Paracoccus marcusii*, which are accumulating high-levels of Astaxanthin, *P. marcusii*  $\Delta$ crtB mutant which lacks carotenoids, *Escherichia coli* OP50 strain (Taxonomy ID 637912), recombinant *E. coli* cells carrying the pASTA plasmid for the expression of Astaxanthin (Cunningham and Gantt 2007). The carotenoid composition in different bacterial strains used in this work is indicated in Supplementary Table S1. In addition, the worms were also grown in the presence of *E. coli* cells in agar-plates supplemented with Astaxanthin (extracted from the algae *Haematococcus pluvialis*) solubilized in 5% DMSO (w/v), and agar-plates containing 5% DMSO with *E. coli* (OP50) cells, as control. Experiments were performed at 20°C, with the exception of *glp-1* and *daf-2* mutant-lines which were conducted at 25°C. In the *daf-2* experiments, the worms were grown at 16°C until the L4 stage, and then transferred to 25°C. For each experiment, 80 adult animals were placed on four separate NGM-plates. Animals were considered dead when they no longer responded to gentle prodding with a platinum wire. Scoring was performed every day. For all lifespan experiments, assays were repeated at least twice.

### Measurements of carotenoids concentration

Wild-type *P. marcusii* or *E. coli* producing Astaxanthin were plated on NGM media, harvested from the plates and resuspended in 2 ml of DDW. The cells were then washed once in 2 ml DDW. The bacterial suspension (1.8 ml) was incubated at 105°C for 24 h, after which the weight of the bacteria was measured. For carotenoid extraction, after washing in DDW, the cells were resuspended in 1 ml of acetone and incubated at 65°C for 10 min in the dark. The

samples were centrifuged again at 13,000 xg for 10 min and the acetone supernatant, containing the pigments, was placed in a clean tube. The pigment extract was dried with N<sub>2</sub> and then stored in the freezer at -20°C. Acetone-dissolved pigment extracts were analyzed by high performance liquid chromatography (HPLC), essentially as previously described (Neuman et al. 2014, Ronen et al. 1999), using a Waters 996 photodiode array detector. Carotenoids were identified based on their characteristic absorption spectra and typical retention times, which corresponded to standard compounds (Isaacson *et al.* 2002). For Astaxanthin extraction, wild-type algae *Haematococcus pluvialis* (kindly provided by Prof. Sammy Boussiba, BGU) were grinded with a mortar and pestle in 5 ml of acetone. The cells were incubated at 65°C for 10 min in the dark, and centrifuged at 13,000 xg for 10 min. The supernatant, containing acetone-soluble pigments, was placed in a clean tube, dried with a stream of N<sub>2</sub> and then subjected to HPLC analysis.

### **Crude mitochondrial preparations from *C. elegans* cells**

Mitochondria were isolated from *C. elegans* according to the method described in Grad *et al.* (2007). Bleached embryos were grown at 20°C, on NGM plates seeded with either *P. marcusii* expressing Astaxanthin or *E. coli* (OP50). Before extraction, worms of the specified stages were washed off plates with sterile M9 solution (42 mM Na<sub>2</sub>HPO<sub>4</sub>, 22 mM KH<sub>2</sub>PO<sub>4</sub>, 86 mM NaCl, and 1 mM MgSO<sub>4</sub>·7H<sub>2</sub>O). The worms were pelleted by centrifuging at 3,000g for 5 min, and then resuspended in 10 ml of ice-cold isolation buffer (IB) (210 mM mannitol, 70 mM sucrose, 0.1 mM EDTA, 5 mM Tris-HCl pH 7.4) in the presence of protease inhibitors. The worms were homogenized using a glass homogenizer for 15 strokes. The homogenate was collected in a 50 ml tube and 10 ml of IB was added. Then tubes were centrifuged at 750 g for 10 min at 4°C. The clear supernatant was transferred to a new tube, and centrifuged at 12,000 g for 10 min at 4°C to pellet the mitochondria. The organellar fraction was washed once in 10 ml ice-cold IB (12,000g for 10 min at 4°C), and the mitochondrial pellet was aliquoted and stored at -80°C.

### **Mitochondrial extraction from cauliflower**

Mitochondria were isolated from cauliflower (*Brassica oleracea* var. botrytis) inflorescences, which allows the purification of large quantities of highly enriched organellar preparations (Keren *et al.* 2009, Neuwirt *et al.* 2005, Sultan *et al.* 2016). About 1.0 kg fresh weight inflorescences were cut off from the stems and kept overnight (about 16 h) in cold water (4°C). In the following morning, the inflorescences were ground with ice-cold extraction buffer (0.9 M mannitol, 90 mM Na-pyrophosphate, 6 mM EDTA, 2.4% PVP25 (w/v), 0.9% BSA (w/v), 9 mM cysteine, 15 mM glycine, and 6 mM β-mercaptoethanol; pH 7.5). Mitochondria were

recovered from the extract by differential centrifugations and purified on Percoll gradients. Following fractionation, the mitochondria were pelleted, resuspended in a small volume of wash buffer (0.3 M mannitol, 10 mM K-phosphate, 1 mM EDTA, pH 7.5), aliquoted and stored frozen at -80°C. For the isolation of mitochondria from *Arabidopsis*, we used 2-week-old seedlings grown on MS-plates. The enriched organelle preparation was performed essentially as described in (Keren *et al.* 2012). For analysis of Astaxanthin effects, the mitochondria were incubated with Astaxanthin dissolved in DMSO or DMSO alone for 5 min on ice.

### **Mitochondrial enriched preparation from mammals**

Mitochondrial enriched fraction, was prepared from human (fibroblast) and mouse (heart) by teflon-glass homogenization and differential centrifugation in sucrose buffer (250 mM Sucrose, 10 mM Tris pH 7.4, 50 µg/ml heparin) as described (Saada *et al.* 2003). For enzymatic activities, mitochondria were pre-incubated with Astaxanthin or DMSO for 5 min on ice prior to assay.

### **Blue native electrophoresis for isolation of native organellar complexes**

Blue native (BN)-PAGE of mitochondrial fractions was performed according to the method described by (Eubel *et al.* 2003). Mitochondrial pellets were solubilized with n-dodecyl-β-maltoside (1.5% [w/v]) in ACA buffer (750 mM amino-caproic acid, 0.5 mM EDTA, and 50 mM Tris-HCl, pH 7.0), and then incubated on ice for 30 min. The samples were centrifuged 8 min at 20,000g, and Serva Blue G (0.2% [v/v]) was added to the supernatant. The samples were then loaded onto a native 4% to 16% gradient gel. For non-denaturing-PAGE-Western blotting, the gel was transferred to a PVDF membrane (Bio-Rad) in Cathode buffer (50 mM Tricine and 15 mM Bis-Tris-HCl, pH 7.0) for 16 h at 4°C (const. 40 mA). The membrane was incubated with various antibodies, as indicated for each blot, and detection was carried out by chemiluminescence assay after incubation with an appropriate horseradish peroxidase (HRP)-conjugated secondary antibody.

### **SDS-PAGE gel electrophoresis**

Organellar protein concentration was determined by the Bradford method (BioRad, Catalog no. 5000201) according to the manufacturer's protocol, with bovine serum albumin (BSA) used as a calibrator. For immunoassays, an aliquot equivalent to 600 µg *C. elegans* mitochondrial proteins was suspended in sample loading buffer (Laemmli 1970) and subjected to SDS-PAGE (at a constant 100 V). Following electrophoresis, the proteins were transferred to a PVDF

membrane (BioRad, Catalog no. 1620177) and incubated overnight at 4<sup>0</sup>C with various primary antibodies (Table S2). Detection was carried out by chemiluminescence assay after incubation with an appropriate horseradish peroxidase (HRP)-conjugated secondary antibody.

### **Assessment of mitochondrial respiratory chain enzymatic activities**

In-gel activity stains of mitochondrial respiratory complexes I, II and IV was carried out according to (Eubel *et al.* 2005). Following BN-electrophoresis, the gels were washed several times with DDW. For Complex I activity staining, the BN-gels were incubated in CI-activity assay solution (100 mM Tris-HCl, pH 7.4, 0.14 mM NADH, 1 mg/ml NBT solution), for 10 to 30 min until the purple staining of CI bands became visible in the gel. Complex II activity staining was carried out with 50 mM KH<sub>2</sub>PO<sub>4</sub> buffer (pH 7.4), 84 mM succinate, 0.2 mM PMS and 2 mg/ml NBT solution. For complex IV activity staining, the BN-gels were incubated in 10 mM KH<sub>2</sub>PO<sub>4</sub> buffer (pH 7.4), 1 mg/ml DAB solution and 0.2 mg cytochrome c. Reactions were stopped in fixing solution containing 15% (v/v) ethanol and 10% (v/v) acetic acid. All steps were carried out at room temperature. Respiratory chain activities and citrate synthase activity assayed by spectrophotometric methods at 37°C (Kirby *et al.* 2007, Shufaro *et al.* 2012). Briefly, complex I was measured as rotenone sensitive NADH-CoQ reductase at 340 nm in the presence of coenzyme Q<sub>1</sub>. Complex II was measured as succinate dehydrogenase (SDH) based on the succinate-mediated phenazine methosulfate reduction of DCPIP (dichloroindophenol indophenol) at 600 nm. Complex II + III was measured as thenoyltrifluoroacetone sensitive succinate cytochrome c reductase at 550 nm. Complex III was measured as antimycin sensitive ubiquinol cytochrome c reductase at 550 nm. Complex IV. (cytochrome c oxidase) was measured by following the oxidation of reduced cytochrome c at 550 nm. Citrate synthase (CS), an ubiquitous Krebs cycle enzyme, serving as a control, was measured in the presence of acetyl-CoA and oxaloacetate by monitoring the liberation of CoASH coupled to 5',5-dithiobis (2-nitrobenzoic) acid (i.e., Absorbance at 412 nm).

### **Respiration activity**

Oxygen consumption (O<sub>2</sub>-uptake) measurements were performed with a Clarke-type oxygen electrode (Oxytherm System, Hansatech Instruments, Norfolk, UK), and the data feed was collected by Oxygraph-Plus software, essentially as described previously (see e.g., (Shevtsov *et al.* 2018). The electrode was calibrated with O<sub>2</sub>-saturated water, and by depletion of the oxygen in the electrode chamber with the addition of excess sodium dithionite. Total respiration was measured at 25°C in the dark, following the addition of 250 µL *C.elegans* suspension from



different treatments ( $\pm$  Astaxanthin) and mutant-lines to a 2.25 ml of M9 solution in the respiration chamber. The *C.elegans* suspension was prepared by 1/16 dilution of dense packed worms from 5 plates in M9 buffer. Oxygen consumption was also measured in the presence of various inhibitors, including Rotenone (Rot), Antimycin A (Anti A) and potassium cyanide (KCN).

## Statistical Analyses

Lifespan curves were analyzed by plotting Kaplan-Meier survival curves (Goel *et al.* 2010), and by conducting Log-rank tests (Mantel 1966). Mean lifespan data was compared using Log-rank test with multiple comparisons test, OASIS-2 (Han *et al.* 2016). Differences with P-value smaller than 0.05 were considered as statistically significant.

## Results

### Feeding adult *C. elegans* with Astaxanthin cause significant extension in their lifespan

Synchronized *C. elegans* animals were grown for 5 days at 20°C on NGM plates containing *P. marcusii* cells (expressing Astaxanthin) or in the presence of *P. marcusii*  $\Delta$ crtB mutant-line (lacks carotenoids expression). Following 5 days, the intestine of the worms was cleaned by transferring the animals to new NGM plates, containing *E. coli* (OP50) cells, for additional 24 hours (Images of *C. elegans* before and after intestine cleaning procedure are provided in Supplementary Figure S2). Under these conditions, the average lifespan of wild-type *C. elegans* (N2), grown on agar plates and fed with *Paracoccus marcusii* (containing on average 716  $\mu$ g Astaxanthin per gram of dry material), was about 20% longer (i.e., 24 Days vs. 20 Days) than *C. elegans* fed with *P. marcusii*  $\Delta$ crtB mutant that lacks carotenoids (P-value = 0.0038) and about 45% longer (24 Days vs. 17 Days) compared with those of *C. elegans* fed with *E. coli* OP50 cells (P-value = 0.00003) (Fig. 1). Likewise, feeding *C. elegans* with a recombinant *E. coli* cell-line which produces Astaxanthin (pASTA, 146  $\mu$ g Astaxanthin per gram of dry material), was also sufficient to significantly increase the lifespan of the worms by about 20% (P-value = 0.0114, Fig. 1B). Feeding *C. elegans* with Astaxanthin extracted from the algae *Haemayococcus pluvialis* and placed on *E. coli* OP50 strain increased the average lifespan by ~20% (P-value = 0.0173, Fig. 1C). No effect on the lifespan was observed in *C. elegans* fed with *P. marcusii* strains expressing the carotenoids Zeaxanthin (P-value = 0; *P. marcusii*  $\Delta$ crtW, Fig. S2 and Table S1), while Lycopene (*P. marcusii*  $\Delta$ crtY, Table S1) was found to be toxic to the animals (animals arrested at the L2 stage).

Next, we determined the developmental period where Astaxanthin has the most notable effect on the lifespan of *C. elegans* (see Fig. S3). For this purpose, we used four different feeding conditions. These include animals that were fed from the larval L1 until adulthood with Astaxanthin (i.e., in the presence *P. marcusii*), and later transformed to new plates lacking Astaxanthin (i.e., plates containing *P. marcusii*  $\Delta$ crtB) (Fig. S3, L1-Mature +Asta, Adult -Asta). The second condition involved animals from the larva L1 stage until adulthood that were fed with *P. marcusii*  $\Delta$ crtB (lacks Astaxanthin) and later transferred to new plates contacting wild-type *P. marcusii* (produces Astaxanthin) (Fig. S3, L1-Mature -Asta, Adult +Asta). In addition, as controls we also used worms that were fed during their entire lifespan on either *P. marcusii* wild-type (Fig. S3, +Asta) or *P. marcusii*  $\Delta$ crtB (Fig. S3, -Asta).

As indicated Figure S3, feeding animals that are only at their adult stage (Fig. S3, L1-Mature -Asta, Adult +Asta) with Astaxanthin resulted with an increase in lifespan which was similar to that of animals fed with Astaxanthin throughout their entire life (P-values <0.05). However, no significant change in longevity was apparent when the animals were fed with Astaxanthin from the larval L1 stage until young adulthood, but were avoided from being exposed to the pigment, during their adult stage (Fig. S3, L1-Mature +Asta, Adult -Asta). Similarly, no increase in lifespan was seen when the animals are grown on *P. marcusii*  $\Delta$ crtB cells lacking any carotenoids.

We also noted that *C. elegans* animals fed with *P. marcusii* showed a strong red-orange color of the gut (Fig. S4, left panel). Feeding *C. elegans* with *P. marcusii* cells expressing Astaxanthin followed by 24 hours feeding with *E. coli* (OP50) resulted with a strong decolorization of the guts, but some residual red color was still observed in the bod cells (Fig. S4, middle panel). We therefore hypothesize that feeding *C. elegans* at the adult stage with Astaxanthin resulted with the accumulation of Astaxanthin in the cells, an effect that likely correlates with the observed extension in the lifespan.

### **The effects of Astaxanthin on *C. elegans* longevity are tightly associated to the mitochondria-aging pathway**

There are several known pathways that affect aging in *C. elegans* (i.e., the insulin pathway, the dietary restriction system, and the mitochondrial respiration system) (Amrit, *et al.* 2014, Collins, *et al.* 2008). Here, we performed genetic analyses to determine whether and which of the three known aging pathways might be associated with the prolongevity effect of Astaxanthin. We reasoned that animals with mutations in pathways affected by Astaxanthin would show reduced

effects in the presence of the carotenoid on the lifespan extension. Among of the longevity-associated pathway in *C. elegans* is the DAF-16/DAF-2 insulin pathway (Lin *et al.* 2001). We noticed that similarly to the-wild-type animals, Astaxanthin caused an (additional) increase in the lifespan of the *daf-2 (e1370)* (P-value = 0.001) and *daf-16 (mu86)* (P-value = 0.000046) mutant animals (Fig. 2). Similarly, feeding *C. elegans glp-1 (or178)* mutants (Libina *et al.* 2003, TeKippe and Aballay 2010) with Astaxanthin resulted in additional extension of the lifespan (P-value = 0.000024, Fig. 2). We therefore concluded that Astaxanthin effect on *C. elegans* lifespan are independent of the insulin/IGF signaling pathway. Another well-characterized pathway of lifespan extension involves dietary restriction (Lakowski and Hekimi 1998). Here too, feeding *eat-2 (ad1116)* mutant animals with Astaxanthin resulted with an extended lifespan (P-value = 0.011, Fig. 2), indicating that Astaxanthin effect on *C. elegans* lifespan are also independent of the dietary restriction mechanism.

In addition to the insulin/IGF signaling and dietary restriction pathways, life-extending in animals also involves the mitochondrial respiration system (i.e., mitochondrial dysfunctions resulting with extended lifespan) (Murakami and Murakami 2005). It is postulated that mutations in genes encoding components of the mitochondrial electron transport chain (ETC) lower the levels of ROS and thereby may increase the lifespan of the animals (Murakami and Murakami 2005). Electron leakage from complex III is suggested to be a major contributor to the generation of ROS within the mitochondria (Brand 2010, Chen *et al.* 2003, Quinlan *et al.* 2013). To test whether reduced respiration activities may influence the prolongevity-mediated effects by Astaxanthin, we analyzed the lifespan of *C. elegans* mutants in genes encoding respiratory-related proteins. Mutants in the Rieske iron-sulfur protein (RISK) of complex III (i.e., *isp-1* mutants, also denoted as *qm150*), showed reduced (shortened) lifespan when they were treated (fed) with Astaxanthin (P-value = 0.000011, Fig. 2). These results strongly suggest that the Astaxanthin-mediated longevity effects involve complex III. The effects of Astaxanthin on the lifespan was further analyzed in *C. elegans* mutants affected in other mitochondrial proteins. *CLK-1* encodes a demethoxyubiquinone hydroxylase enzyme required for ubiquinone biosynthesis. *C. elegans clk-1* mutants show a pleiotropic phenotype that includes slowed development and aging (Branicky *et al.* 2006). However, the data showed that Astaxanthin-mediated longevity was not affected in the *clk-1 (e2519)* animals (P-value =  $1.1 \times 10^{-7}$ , Fig. 2). Feeding *C. elegans gas-1 (fc21)* (affected in complex I) or *mev-1 (kn1)* (affected in complex II) mutants with Astaxanthin, resulted with mild extensions in longevity (P-values 0.0024 and 0.2831, respectively). Taken together, these data indicate that the Astaxanthin-extended

lifespan effects we see in *C. elegans* rely on the level or activity of respiratory complex III, and maybe to some extent on other respiratory-mediated functions.

### **Astaxanthin affects the biogenesis of the native respiratory complex III, *in vitro***

The Astaxanthin-mediated effects we see suggest that Astaxanthin increases the lifespan of *C. elegans* by influencing the biogenesis or function of the respiratory system via CIII and maybe CI and CII as well (Fig. 2). To analyze whether Astaxanthin directly affect the biogenesis or activities of these respiratory complexes, we used *in vitro* analyses with crude mitochondria preparations (i.e., ‘*in-organello*’ assays), obtained from both animals and plants. These include *C. elegans*, rodents, human and cauliflower mitochondria (*Brassica oleracea* var. botrytis) (see Materials and Methods). For this purpose, Astaxanthin was extracted from the algae *Haematococcus pluvialis*, solubilized in 5% DMSO and then incubated with the mitochondria for 30 min on ice. The integrity of native respiratory complexes in *C. elegans*, cauliflower, rodents and human, was investigated by BN-PAGE analyses (Fig. 3 and Fig. S5).

Figure 3A shows the effects of increased Astaxanthin concentrations (i.e., 0, 9 and 14  $\mu$ M) on native respiratory complexes in animal mitochondria. A decreased level of a high-molecular mass band (about 500 kDa), which we expected to corresponds to a native complex III dimer (i.e., holo-CIII<sub>2</sub>), was observed in *C. elegans* mitochondria treated with Astaxanthin. Notably, this Astaxanthin-mediated reduction in the ~500 kDa band, was followed by the appearance of a ~350 kDa band, which may corresponds to a partially disassembled CIII particle (i.e., CIII\*). BN-PAGEs of crude mitochondria preparations obtained from rodents and human treated Astaxanthin showed the same patterns (i.e., reduced intensities of the ~500 kDa complex and an accumulation of ~350 kDa particles) (Fig. 3A). To analyze whether similar effects may occurs *in vivo*, we analyzed the integrity of respiratory complexes in *C. elegans* fed with Astaxanthin. For this purpose, young adult worms were grown for 7 days in the presence of wild-type *P. marcusii*, washed several times to remove bacterial contaminants and crude mitochondria preparations were obtained, essentially as described previously (Grad, *et al.* 2007). Organellar proteins from *E.coli* (-Asta) and *P. marcusii* (+Asta) fed *C. elegans* were separated by under native conditions. The BN-PAGE assays indicated that the absorption or uptake of Astaxanthin (Fig. S4) also resulted with a reduction in the 500 kDa band and the accumulation of the 350 kDa particles (Fig. S5).

We next analyze the effects of Astaxanthin on mitochondria isolated from cauliflower inflorescences, as this tissue allows the purification of large quantities of highly-pure mitochondria preparations (Keren, *et al.* 2009, Neuwirt, *et al.* 2005, Sultan, *et al.* 2016).

Mitochondria respiratory complexes were then separated by BN-PAGE analysis (Fig. 3B and Supplementary Fig. S6). Arrows indicate to native respiratory complexes CI (~1,000 kDa), a CIII dimer, (CIII<sub>2</sub>, about 500 kDa), CIV (~220 kDa) and CV (~600 kDa) in cauliflower mitochondria. In plant's mitochondria as well, the addition of Astaxanthin led to a notable reduction in the levels of the 500 kDa corresponding to CIII<sub>2</sub>, followed by the accumulation of a lower (about 300 kDa band) corresponding to sub-CIII particle (CIII\*) (Fig. 3B). These were correlated with the levels of Astaxanthin added to the isolated mitochondria (Fig. 3C). BN-PAGEs followed by immunoblot analyses with antibodies raised to RISP subunit (iron-sulfur protein of complex III), indicated that both the ~350 kDa and 500 kDa particles contain RISP (Fig. 3 and Fig. S6), strongly supporting that these particles correspond to holo-CIII<sub>2</sub> and sub-CIII\*. The Astaxanthin-mediated effects (i.e., decreased CIII<sub>2</sub> levels and increased amounts of the 350 kDa band) seem specific to Astaxanthin, as mitochondria treated with DMSO alone had no obvious effects on the levels or integrity of respiratory complexes I, III and V in cauliflower mitochondria (Fig. 3B), while the addition of β-Carotene or Zeaxanthin had no obvious effects on the integrity of the organellar complexes (Fig. S5B). Mass-spectrometry (LC-MS/MS) analyses of gel slices corresponding to holo-CIII<sub>2</sub> (upper band) and CIII\* particles (lower band) obtained from human (Table S3) and plant (Table S4) mitochondria, indicated the presence of numerous subunits of CIII (see Table 2). The LC-MS/MS data also indicated the presence of many other peptides that are corresponding to CI (mainly), CIII, CIV, CV and various other known mitochondrial proteins. These may be associated with the CIII particles. However, it is anticipated that these proteins rather correspond to various sub-particles of respiratory complexes that are migrating with similar masses to those of the holo-CIII<sub>2</sub> and CIII\*, as only the immunoblots with RISP analyses indicated a correlation with the reduction in the CIII dimer and to increased levels of the lower (350 kDa) band (Figs. 3C and S6). As indicated by immunoblots, the presence of RISP protein in the holo-CIII<sub>2</sub> and CIII\* of both human and cauliflower mitochondria, was also supported by the LC-MS/MS data (Table 2 and Supplementary Tables S3 and S4).

In addition to CIII, Astaxanthin may also affects the accumulation of CI (using anti-CA2 antibodies) and the ATP-synthase (CV, anti-ATPA antibodies) in cauliflower mitochondria (Fig. 3C and Fig. S6). BN-PAGE analyses followed by immunoblots corresponding to CI (with anti-CA2 antibodies) and ATP-synthase (CV, anti-ATPA antibodies) indicated to reduced holo-CI (~1,000 kDa) and a ~1,500 kDa particle, corresponding to a 'supercomplex' containing CI and CIII<sub>2</sub> (i.e., CI+CIII<sub>2</sub>), which was also apparent in the

immunoblots with anti-RISP antibodies (Figs. 3C and S6). Yet, the pigment has no obvious effect on the levels and biogenesis of the native complex V (Fig. 3C and Fig. S6).

The steady-state levels of various mitochondria proteins in Astaxanthin-fed *C. elegans* was assayed by immunoblot analyses, with antibodies generated to various respiratory complexes, including CI (C25H3.9), CIII (ISP-1), CIV (CTC-1) and CV (ATP-5) and cytochrome C (CYC-1) (see Table S2). In each assay, the steady-state levels of different proteins in the Astaxanthin-fed animals were compared to those of untreated wild-type animals of the same age at different total protein loadings (i.e., 0.15 up to 1.5 times) (Fig. 4). The levels of various mitochondrial proteins, including C25H3.9 (CI), CTC-1 (CIV) and ATP-5 (CV) did not changed significantly between the control and Astaxanthin-fed animals or the *C. elegans isp-1* mutants (Fig. 4B). A reduction in the signal of cytochrome C (CYC-1) was observed in *C. elegans isp-1* mutants, but not in animals fed with Astaxanthin. We also noticed a notable reduction in RISP signals in both *isp-1* animals and wild-type *C. elegans* fed with Astaxanthin. While a reduction in RISP is expected in the case of the *isp-1* mutant-line (Fig. 4, ISP-1 panel), it remains unclear why a notable reduction in RISP is seen in animals fed with Astaxanthin, whereas the protein remains intact in the ‘*in organello*’ assays. A reasonable explanation is that when the worms are fed with Astaxanthin they undergo continues disassembly of CIII (or the supercomplex of CI-CIII). Under these conditions, various complex III (and possibly CI) subunits, including the RISP protein, may become more susceptible to proteolysis by organellar proteases and peptidases, while much lower degradation rates are expected under the in vitro conditions (i.e., short incubations on ice).

### ***C. elegans* treated with Astaxanthin display altered respiratory functions**

Analyses of native mitochondrial complexes, using denaturing PAGE profiles, suggested to alter CIII and maybe CI biogenesis in *C. elegans* fed with Astaxanthin. To determine whether the respiratory activity was affected in animals fed with Astaxanthin, we monitored the oxygen (O<sub>2</sub>) uptake rates of non-treated versus Astaxanthin-fed wild-type *C. elegans* and *isp-1* mutants, using a Clark-type electrode (Hansatech Instruments, Norfolk, UK). For this purpose, synchronized late L4 worms were collected and washed several times with M9 buffer. Oxygen consumption was monitored in the worms in a sealed chamber (see e.g., (Cohen *et al.* 2014, Keren, *et al.* 2012, Shevtsov, *et al.* 2018, Zmudjak *et al.* 2013). Each respiration chamber contained 250 µl of packed *C. elegans* suspension diluted 10 times in M9 buffer. These measurements indicated that *C. elegans* fed on Astaxanthin and the *isp-1* mutants have reduced respiration activities (i.e.,  $15.03 \pm 3.03$  and  $14.33 \pm 2.88$  nmol O<sub>2</sub>·min<sup>-1</sup>·mg<sup>-1</sup> total protein),

respectively, compare to those of the non-treated wild-type animals (i.e.,  $28.83 \pm 3.07$  nmol  $O_2 \cdot \text{min}^{-1} \cdot \text{mg}^{-1}$  total protein) (Fig. 4).

Here, we also measured the  $O_2$ -uptake rates in the presence of various inhibitors, including Rotenone (Rot), which inhibits complex I electron transport, the complex III inhibitor Antimycin A (Anti A) and Potassium cyanide (KCN) that blocks electron transport from complex IV to oxygen. As shown in Figure 4, both Rot and Anti-A have noticeable effects on the respiratory activities of the non-treated wild-type, compared to those of *isp-1* mutant or *C. elegans* fed with Astaxanthin ( $55\% \pm 2.95$  and  $66\% \pm 0.70$  compared to  $34\% \pm 0.99$   $O_2 \cdot \text{min}^{-1} \cdot \text{mg}^{-1}$  total protein, respectively). In contrast, KCN had similar effects on the  $O_2$ -uptake rates of wild-type worms, worms fed on Astaxanthin and the *isp-1* mutants ( $85\% \pm 5.18$  and  $90\% \pm 2.35$ , and  $95\% \pm 0.19$ ,  $O_2 \cdot \text{min}^{-1} \cdot \text{mg}^{-1}$  total protein, respectively) (Fig. 4). These results further indicate to altered respiratory CI- and CIII-mediated activities.

### **Astaxanthin inhibits enzymatic activities of mammalian complexes I and III.**

The BN-PAGE (Fig. 3 and Suppl. Figs. S4-S6), LC-MS/MS (Table S4) and the respiration activity data (Fig. 4) indicate that Astaxanthin has a strong effect on the biogenesis and functions of CIII, and presumably affects CI and the supercomplex I+III, as well. These data were further supported by analyses of the enzymatic activities of native respiratory complexes in the presence or absence of Astaxanthin. Table 1 shows the effects on the respiratory functions of mitochondrial complexes isolated from mouse heart that were pre-incubated with DMSO alone (Mock) or with purified Astaxanthin dissolved in DMSO (see Materials and Methods). The biochemical assays indicated to significant decreases in the activities of both complexes I and III. The inhibitory effect of Astaxanthin was even more pronounced in enzymatic activity assays of CI+CIII, which approached the respiratory assay sensitivity limits. These analyses also indicated that complexes II, IV and citrates synthase enzyme were not, or only slightly, affected by the addition of Astaxanthin to animals mitochondria.

## **Discussion**

The nematode *Caenorhabditis elegans* is a well-established animal system to study organismal aging, and for the characterizing and identifying new drugs that can extend lifespan and improve the quality of old age in animals. Here, we used *C. elegans* to study the molecular basis of the anti-aging effects of Astaxanthin consumed by various organisms. Our results show that Astaxanthin extends *C. elegans* lifespan by 20%-40%. The effects on the life span seem specific

to Astaxanthin, as other carotenoids tested here, including Zeaxanthin and Lycopene had no lifespan extension effects. In addition, the anti-aging role of Astaxanthin had no obvious effects on the reproduction, age pigmentation and locomotion of the animals. The life-extension phenotype, induced by Astaxanthin, relies mainly on *isp-1* mutants that are affected in mitochondria respiratory complex III, but not on *gas-1* (complex I) and *clk-1* (ubiquinol biosynthesis), nor on other aging-related pathways (i.e., the insulin/IGF-1 and dietary restriction pathways), as indicated by lifespan measurements of *daf-2/daf-16*, *eat-2* or *glp-1* mutants fed with Astaxanthin.

Remarkably, Astaxanthin added to isolated mitochondria causes a reduction in the levels of holo-complex-III<sub>2</sub> and supercomplex I+III, and to the appearance of lower molecular-mass particles that correspond to sub-CIII particles. Accordingly, BN-PAGE and LC-MS/MS analyses indicated the presence of various CIII subunits in both the high and lower mass particles. The presence of various complex I subunits in these gel-bands, may relate to the strong association of complexes I and III, which together with complex IV also form a stable supercomplex known as the Respirasome (I<sub>1</sub>III<sub>2</sub>IV<sub>1</sub>) (Schafer *et al.* 2006). Alternatively, it remains possible that sub-complex I, IV and V (natively formed or disassemble during mitochondria preparations or gel-run) may migrate with similar masses under the experimental conditions. Together, these analyses indicate that Astaxanthin affects the assembly or biogenesis of complex III and the CI-CIII<sub>2</sub> supercomplex, whose functional roles and assembly are under investigation (Signes and Fernandez-Vizarra 2018). As CIII biogenesis / disassembly are observed in both animal and plant mitochondria (Figs. 3, S5 and S6), the data imply to a universal effect caused by Astaxanthin to CIII, in all eukaryotes.

Reduced accumulation of CIII is expected to affect the respiratory functions of *C. elegans* cells fed with Astaxanthin. The O<sub>2</sub>-uptake rates of worms fed on Astaxanthin or *isp-1* mutants were reduced by about 2x folds (Fig. 5), compared to those measured in the non-treated (control) *C. elegans*. Similarly, the oxygen consumption of Astaxanthin-treated mitochondria, isolated from mouse cells was lowered by more than 50%, and to reduced activities of the respiratory complexes I and III. Currently, it remains unclear how Astaxanthin affects the assembly or biogenesis of complex III in plants and animals. It is possible that Astaxanthin interacts with complex III and thereby interfere with the assembly process or destabilizes the integrity of the native complex. Due to its skeletal properties (long polyene chain as well as two oxygenated β-ionone-type rings), Astaxanthin seems to share some chemical equivalents with ubiquinol (contains a single benzylquinone head-group ring). Astaxanthin may therefore interfere with the association of ubiquinol with CIII, affecting RISP stability, the assembly state



of the holo-CIII or the integrity of the CI-CIII<sub>2</sub> supercomplex. Another possible effect of Astaxanthin may involve cardiolipin, a unique phospholipid that is an important component of the inner-mitochondrial membrane. Crystal structures show that cardiolipin (CL) is tightly associated with CIII *in vivo* (Lange *et al.* 2001) and affects the assembly of various respiratory complexes (Paradies *et al.* 2014). The absorption of Astaxanthin (*in vivo* or *in vitro*) may interfere with the association of CL with CIII and thereby affects its biogenesis and function. However, such speculations require further investigation.

At this point, it is also not clear to us why RISP was reduced in *C. elegans* fed with Astaxanthin, but seem to remain intact in the ‘*in organello*’ assays of mitochondria treated with Astaxanthin (Figs. 3 and S4). The data indicate that Astaxanthin affects the assembly of CIII, as evident by the appearance of lower molecular mass particles corresponding to sub-CIII particles in the mitochondria. Disassembly of CIII is expected to affect the stability of various CIII subunits, including RISP, leading to their degradation over time, whereas under *in organello* assays (i.e., short incubations on ice; see Materials and Methods), RISP (or various other CIII subunits) remain intact and are less prone for degradation by the organellar proteases.

Mitochondria are major sites for energy metabolism and ATP production in eukaryotic cells, through the oxidative phosphorylation pathway. In light of the expected significance of mitochondria functions to animal and plant physiology, why does the reduced CIII activity and level in Astaxanthin-fed animals or the *isp-1* mutants result with an extended life span? Currently, we cannot provide a definitive explanation, but we speculate that these phenotypes relate to reduced mtROS production. ROS are known to induce oxidative damages of fatty acyl chains of membrane lipids, by ‘lipid-peroxidation’ (Tsuchiya *et al.* 1994). Altered membrane integrity has many pathological consequences in human, such as neurological diseases, inflammations, diabetes, cancer, and aging. Astaxanthin is a strong antioxidant that was recently suggested to reduce mtROS production in *C. elegans* and other animals (Kuraji *et al.* 2016, Liu, *et al.* 2016, Wu *et al.* 2015). Our data indicate to an additional mechanism by which Astaxanthin affects the life span of animals. The association of Astaxanthin with CIII destabilizes the native complex, resulting with lower molecular mass CIII intermediates and reduced respiration. Lowered respiration activities are likely associated with reduced rates of ‘toxic’ electron leakage from complex III, a major contributor to the generation of mtROS (Brand 2010, Chen *et al.* 2003, Quinlan *et al.* 2013), and thereby can protect the cells (and organelles) from oxidative damages. Accordingly, the aging related mechanism through mitochondria activities have been previously related to ROS production (Murakami and Murakami 2005, Quinlan, *et al.* 2013).

In summary, our data provide with novel insights into the molecular mechanism of longevity extension mediated by Astaxanthin in *C. elegans*. Biochemical and genetic studies indicate that Astaxanthin affects complex III biogenesis and activity, and may increase longevity by protecting the animal cells against ROS and oxidative stresses, due to complex III-associated ‘electron leakage’ during respiration. These effects may be universal among different eukaryotes, as similar effects on CIII biogenesis or assembly were noted in plants, worms, rats and human. Our data may also become useful for the development of multi-target drugs designed to CIII in order to prolong the lifespan of animals.

## Acknowledgments

We thank Yuval (Yukon) Stein (The Hebrew University, Jerusalem, Israel) for his assistance with organellar preparations. This work was supported by grants to O.O.B from the ‘Israeli Science Foundation’ (ISF grant no. 741/15).

## References

- Ambati, R.R., Phang, S.M., Ravi, S. and Aswathanarayana, R.G.** (2014) Astaxanthin: sources, extraction, stability, biological activities and its commercial applications--a review. *Marine drugs*, **12**, 128-152.
- Ames, B.N.** (2018) Prolonging healthy aging: Longevity vitamins and proteins. *Proceedings of the National Academy of Sciences of the United States of America*, **115**, 10836-10844.
- Amrit, F.R., Ratnappan, R., Keith, S.A. and Ghazi, A.** (2014) The *C. elegans* lifespan assay toolkit. *Methods*, **68**, 465-475.
- Bar, D.Z., Charar, C., Dorfman, J., Yadid, T., Tafforeau, L., Lafontaine, D.L.J. and Gruenbaum, Y.** (2016) Cell size and fat content of dietary-restricted *Caenorhabditis elegans* are regulated by ATX-2, an mTOR repressor. *Proceedings of the National Academy of Sciences of the United States of America*, **113**, E4620-E4629.
- Barros, M.P., Poppe, S.C. and Bondan, E.F.** (2014) Neuroprotective properties of the marine carotenoid astaxanthin and omega-3 fatty acids, and perspectives for the natural combination of both in krill oil. *Nutrients*, **6**, 1293-1317.
- Brand, M.D.** (2010) The sites and topology of mitochondrial superoxide production. *Experimental gerontology*, **45**, 466-472.
- Branicky, R., Nguyen, P.A.T. and Hekimi, S.** (2006) Uncoupling the pleiotropic phenotypes of *clk-1* with tRNA missense suppressors in *Caenorhabditis elegans*. *Molecular and cellular biology*, **26**, 3976-3985.
- Brenner, S.** (1974) The genetics of *Caenorhabditis elegans*. *Genetics*, **77**, 71-94.
- Chen, Q., Vazquez, E.J., Moghaddas, S., Hoppel, C.L. and Lesnefsky, E.J.** (2003) Production of Reactive Oxygen Species by Mitochondria: CENTRAL ROLE OF COMPLEX III. *Journal of Biological Chemistry*, **278**, 36027-36031.
- Chen, Y., Onken, B., Chen, H., Xiao, S., Liu, X., Driscoll, M., Cao, Y. and Huang, Q.** (2014) Mechanism of Longevity Extension of *Caenorhabditis elegans* Induced by Pentagalloyl Glucose Isolated from Eucalyptus Leaves. *Journal of agricultural and food chemistry*, **62**, 3422-3431.
- Cohen, S., Zmudjak, M., Colas des Francs-Small, C., Malik, S., Shaya, F., Keren, I., Belausov, E., Many, Y., Brown, G.G., Small, I. and Ostersetzer-Biran, O.** (2014) nMAT4, a maturase

- factor required for nad1 pre-mRNA processing and maturation, is essential for holocomplex I biogenesis in Arabidopsis mitochondria. *The Plant Journal*, **78**, 253-268.
- Collins, J.J., Huang, C., Hughes, S. and Kornfeld, K.** (2008) The measurement and analysis of age-related changes in *Caenorhabditis elegans*. *WormBook : the online review of C. elegans biology*, 1-21.
- Eubel, H., Braun, H.-P. and Millar, A.H.** (2005) Blue-native PAGE in plants: a tool in analysis of protein-protein interactions. *Plant methods*, **1**, 11-11.
- Eubel, H., Jänsch, L. and Braun, H.-P.** (2003) New Insights into the Respiratory Chain of Plant Mitochondria. Supercomplexes and a Unique Composition of Complex II. *Plant Physiology*, **133**, 274-286.
- Fiedor, J. and Burda, K.** (2014) Potential role of carotenoids as antioxidants in human health and disease. *Nutrients*, **6**, 466-488.
- Goel, M.K., Khanna, P. and Kishore, J.** (2010) Understanding survival analysis: Kaplan-Meier estimate. *International journal of Ayurveda research*, **1**, 274-278.
- Grad, L.I., Sayles, L.C. and Lemire, B.D.** (2007) Isolation and functional analysis of mitochondria from the nematode *Caenorhabditis elegans*. *Methods in molecular biology (Clifton, N.J.)*, **372**, 51-66.
- Han, S.K., Lee, D., Lee, H., Kim, D., Son, H.G., Yang, J.-S., Lee, S.-J.V. and Kim, S.** (2016) OASIS 2: online application for survival analysis 2 with features for the analysis of maximal lifespan and healthspan in aging research. *Oncotarget*, **7**, 56147-56152.
- Henricson, A., Sonnhammer, E.L., Baillie, D.L. and Gomes, A.V.** (2004) Functional characterization in *Caenorhabditis elegans* of transmembrane worm-human orthologs. *BMC Genomics*, **5**, 85.
- Higuera-Ciapara, I., Felix-Valenzuela, L. and Goycoolea, F.M.** (2006) Astaxanthin: a review of its chemistry and applications. *Critical reviews in food science and nutrition*, **46**, 185-196.
- Huangfu, J., Liu, J., Sun, Z., Wang, M., Jiang, Y., Chen, Z.Y. and Chen, F.** (2013) Antiaging effects of astaxanthin-rich alga *Haematococcus pluvialis* on fruit flies under oxidative stress. *Journal of agricultural and food chemistry*, **61**, 7800-7804.
- Isacson, T., Ronen, G., Zamir, D. and Hirschberg, J.** (2002) Cloning of tangerine from tomato reveals a carotenoid isomerase essential for the production of beta-carotene and xanthophylls in plants. *The Plant cell*, **14**, 333-342.
- Keren, I., Bezawork-Geleta, A., Kolton, M., Maayan, I., Belausov, E., Levy, M., Mett, A., Gidoni, D., Shaya, F. and Ostersetzer-Biran, O.** (2009) AtnMat2, a nuclear-encoded maturase required for splicing of group-II introns in Arabidopsis mitochondria. *RNA*, **15**, 2299-2311.
- Keren, I., Tal, L., Colas des Francs-Small, C., Araújo, W.L., Shevtsov, S., Shaya, F., Fernie, A.R., Small, I. and Ostersetzer-Biran, O.** (2012) nMAT1, a nuclear-encoded maturase involved in the *trans*-splicing of *nad1* intron 1, is essential for mitochondrial complex I assembly and function. *Plant J*, **71**, 413-426.
- Kirby, D.M., Thorburn, D.R., Turnbull, D.M. and Taylor, R.W.** (2007) Biochemical assays of respiratory chain complex activity. *Methods in cell biology*, **80**, 93-119.
- Kuraji, M., Matsuno, T. and Satoh, T.** (2016) Astaxanthin affects oxidative stress and hyposalivation in aging mice. *Journal of clinical biochemistry and nutrition*, **59**, 79-85.
- Laemmli, U.K.** (1970) Cleavage of structural proteins during the assembly of the head of bacteriophage T4. *Nature*, **227**, 680-685.
- Lai, C.H., Chou, C.Y., Ch'ang, L.Y., Liu, C.S. and Lin, W.** (2000) Identification of novel human genes evolutionarily conserved in *Caenorhabditis elegans* by comparative proteomics. *Genome Res*, **10**, 703-713.
- Lakowski, B. and Hekimi, S.** (1998) The genetics of caloric restriction in *Caenorhabditis elegans*. *Proc Natl Acad Sci U S A*, **95**, 13091-13096.
- Lange, C., Nett, J.H., Trumppower, B.L. and Hunte, C.** (2001) Specific roles of protein-phospholipid interactions in the yeast cytochrome bc1 complex structure. *The EMBO Journal*, **20**, 6591-6600.
- Libina, N., Berman, J.R. and Kenyon, C.** (2003) Tissue-specific activities of *C. elegans* DAF-16 in the regulation of lifespan. *Cell*, **115**, 489-502.

- Lin, K., Hsin, H., Libina, N. and Kenyon, C.** (2001) Regulation of the *Caenorhabditis elegans* longevity protein DAF-16 by insulin/IGF-1 and germline signaling. *Nat Genet*, **28**, 139-145.
- Liu, X., Luo, Q., Rakariyatham, K., Cao, Y., Goulette, T., Liu, X. and Xiao, H.** (2016) Antioxidation and anti-ageing activities of different stereoisomeric astaxanthin in vitro and in vivo. *Journal of Functional Foods*, **25**, 50-61.
- Mantel, N.** (1966) Evaluation of survival data and two new rank order statistics arising in its consideration. *Cancer chemotherapy reports*, **50**, 163-170.
- Murakami, S. and Murakami, H.** (2005) The effects of aging and oxidative stress on learning behavior in *C. elegans*. *Neurobiology of aging*, **26**, 899-905.
- Neuwirt, J., Takenaka, M., Van Der Merwe, J.A. and Brennicke, A.** (2005) An in vitro RNA editing system from cauliflower mitochondria: Editing site recognition parameters can vary in different plant species. *RNA*, **11**, 1563-1570.
- Paital, B., Panda, S.K., Hati, A.K., Mohanty, B., Mohapatra, M.K., Kanungo, S. and Chainy, G.B.N.** (2016) Longevity of animals under reactive oxygen species stress and disease susceptibility due to global warming. *World journal of biological chemistry*, **7**, 110-127.
- Paradies, G., Paradies, V., De Benedictis, V., Ruggiero, F.M. and Petrosillo, G.** (2014) Functional role of cardiolipin in mitochondrial bioenergetics. *Biochimica et Biophysica Acta (BBA) - Bioenergetics*, **1837**, 408-417.
- Quinlan, C.L., Perevoshchikova, I.V., Hey-Mogensen, M., Orr, A.L. and Brand, M.D.** (2013) Sites of reactive oxygen species generation by mitochondria oxidizing different substrates. *Redox Biology*, **1**, 304-312.
- Rao, A.R., Sarada, R., Shylaja, M.D. and Ravishankar, G.A.** (2015) Evaluation of hepatoprotective and antioxidant activity of astaxanthin and astaxanthin esters from microalga-Haematococcus pluvialis. *Journal of food science and technology*, **52**, 6703-6710.
- Raposo, M.F.d.J., de Morais, A.M.M.B. and de Morais, R.M.S.C.** (2015) Carotenoids from Marine Microalgae: A Valuable Natural Source for the Prevention of Chronic Diseases. *Marine drugs*, **13**, 5128-5155.
- Saada, A., Haag, A. and Elpeleg, O.** (2003) mtDNA depletion myopathy: elucidation of the tissue specificity in the mitochondrial thymidine kinase (TK2) deficiency. *Molecular genetics and metabolism*, **79**, 1-5.
- Schafer, E., Seelert, H., Reifschneider, N.H., Krause, F., Dencher, N.A. and Vonck, J.** (2006) Architecture of active mammalian respiratory chain supercomplexes. *J Biol Chem*, **281**, 15370-15375.
- Shevtsov, S., Nevo-Dinur, K., Faigon, L., Sultan, L.D., Zmudjak, M., Markovits, M. and Ostersetzer-Biran, O.** (2018) Control of organelle gene expression by the mitochondrial transcription termination factor mTERF22 in *Arabidopsis thaliana* plants. *PLOS ONE*, **13**, e0201631.
- Shufaro, Y., Lebovich, M., Aizenman, E., Miller, C., Simon, A., Laufer, N. and Saada, A.** (2012) Human granulosa luteal cell oxidative phosphorylation function is not affected by age or ovarian response. *Fertility and sterility*, **98**, 166-172.
- Signes, A. and Fernandez-Vizarra, E.** (2018) Assembly of mammalian oxidative phosphorylation complexes I-V and supercomplexes. *Essays Biochem*, **62**, 255-270.
- Singh, R., Singh, S., Parihar, P., Mishra, R.K., Tripathi, D.K., Singh, V.P., Chauhan, D.K. and Prasad, S.M.** (2016) Reactive Oxygen Species (ROS): Beneficial Companions of Plants' Developmental Processes. *Frontiers in plant science*, **7**, 1299-1299.
- Sultan, L.D., Mileshina, D., Grewe, F., Rolle, K., Abudraham, S., Glodowicz, P., Khan Niazi, A., keren, I., Shevtsov, S., Klipcan, L., Barciszewski, J., Mower, J.P., Dietrich, A. and Ostersetzer, O.** (2016) The reverse-transcriptase/RNA-maturase protein MatR is required for the splicing of various group II introns in Brassicaceae mitochondria. *The Plant Cell*, **28**, 2805-2829.
- TeKippe, M. and Aballay, A.** (2010) *C. elegans* germline-deficient mutants respond to pathogen infection using shared and distinct mechanisms. *PloS one*, **5**, e11777-e11777.
- Tsuchiya, M., Kagan, V.E., Freisleben, H.-J., Manabe, M. and Packer, L.** (1994) [36] Antioxidant activity of  $\alpha$ -Tocopherol,  $\beta$ -carotene, and ubiquinol in membranes: cis-parinaric acid-incorporated liposomes. In *Methods in Enzymology*: Academic Press, pp. 371-383.

- Wu, H., Niu, H., Shao, A., Wu, C., Dixon, B.J., Zhang, J., Yang, S. and Wang, Y.** (2015) Astaxanthin as a Potential Neuroprotective Agent for Neurological Diseases. *Marine drugs*, **13**, 5750-5766.
- Zhang, L. and Wang, H.** (2015) Multiple Mechanisms of Anti-Cancer Effects Exerted by Astaxanthin. *Marine drugs*, **13**, 4310-4330.
- Zhang, Z., Wang, B., Hu, Q., Sommerfeld, M., Li, Y. and Han, D.** (2016) A new paradigm for producing astaxanthin from the unicellular green alga *Haematococcus pluvialis*. *Biotechnology and bioengineering*, **113**, 2088-2099.
- Zmudjak, M., Colas des Francs-Small, C., Keren, I., Shaya, F., Belausov, E., Small, I. and Ostersetzer-Biran, O.** (2013) mCSF1, a nucleus-encoded CRM protein required for the processing of many mitochondrial introns, is involved in the biogenesis of respiratory complexes I and IV in *Arabidopsis*. *New Phytol*, **199**, 379-394.

**Table 1.** The effects of Astaxanthin on the enzymatic activities of mouse heart mitochondrial respiratory complexes.

| Assay                                     | Activity <sup>1</sup>        |                         |                   |
|-------------------------------------------|------------------------------|-------------------------|-------------------|
|                                           | Vehicle (DMSO <sup>2</sup> ) | Astaxantin <sup>3</sup> | residual activity |
| NADH-CoQ reductase (CI)                   | 354                          | 142                     | 40%               |
| NADH-cytochrome c reductase (CI+III)      | 1464                         | 78                      | 5.3%              |
| Succinate dehydrogenase (CII)             | 498                          | 513                     | 103%              |
| Ubiquinone- cytochrome c reductase (CIII) | 4160                         | 1781                    | 43%               |
| Cytochrome c oxidase (CIV)                | 3638                         | 2828                    | 77%               |
| Citrate synthase                          | 1376                         | 1402                    | 101%              |

<sup>1</sup> - Enzyme activity (nmol O<sub>2</sub> · min<sup>-1</sup> · mg<sup>-1</sup>)

<sup>2</sup>- 5% (v/v) DMSO

<sup>3</sup> - 10 μM Astaxanthin

**Table 2.** Summary of mass-spectrometry (MS) of the ~500 kDa (higher) and ~350 kDa (lower) particles in animals (human) and plant (cauliflower) mitochondria, treated with Astaxanthin.

| Associated respiratory complex | Human                                          |                                                | Cauliflower                                    |                                                |
|--------------------------------|------------------------------------------------|------------------------------------------------|------------------------------------------------|------------------------------------------------|
|                                | No. of subunits identified in the 500 kDa band | No. of subunits identified in the 350 kDa band | No. of subunits identified in the 500 kDa band | No. of subunits identified in the 350 kDa band |
| CI (NADH-dehydrogenase)        | 40                                             | 20                                             | 11                                             | 9                                              |
| CII (succinate dehydrogenase)  | 2                                              | 2                                              | 2                                              | 2                                              |
| CIII (Cytochrome c reductase)  | 13                                             | 12                                             | 11                                             | 10                                             |
| Rieske iron-sulfur protein     | +                                              | +                                              | +                                              | +                                              |
| CIV (Cytochrome c oxidase)     | 15                                             | 11                                             | 1                                              | 1                                              |
| CV (ATP-synthase)              | 13                                             | 11                                             | 8                                              | 7                                              |

## Figure legends

### Figure 1. The effects of Astaxanthin on the lifespan of *C. elegans*.

Survival curves of *C. elegans* fed with Astaxanthin. Between 70-80 animals were used in each experiment. **(A)**. Animals were fed with wild-type *Paracoccus marcusii* (produce Astaxanthin, green), *P. marcusii*  $\Delta$ crtB mutant (lacks carotenoids, orange) or *E. coli* (OP50) cells (blue). The results are the average of 4 independent experiments. **(B)**. *C. elegans* fed with *E. coli*-pASTA (expressing Astaxanthin, green) and *E. coli* cells containing an empty vector (*E. coli* pACYC184, orange). The mean lifespan (in days) was  $19.97 \pm 0.74$ , compared to  $17.34 \pm 0.69$  in the control cells. The results are the average of 5 independent experiments. **(C)**. Animals fed with purified Astaxanthin solubilized with DMSO (green), *E. coli* (OP50) cells (orange) and *E. coli* (OP50) cells + DMSO (blue). The results are the average of 5 independent experiments. **(D)**. The half-life's of worms fed with *P. marcusii* (produce Astaxanthin, green) and *P. marcusii*  $\Delta$ crtB mutant (lacks carotenoids, orange). The results are the average of 7 independent experiments. The values are means of five biological replicates (error bars indicate one standard deviation). Asterisk in panel D indicates a significant difference from control (Student's T-test, P 0.05). Lifespan curves were analyzed by plotting Kaplan-Meier survival curves (Goel, *et al.* 2010). Mean lifespan data was compared using Log-rank test (Mantel 1966) with appropriate correction for multiple comparisons OASIS-2.

### Figure 2. The effects of Astaxanthin on the longevity of *C. elegans* mutated in different life-extending genes

Survival curves of nematodes mutated in genes that regulate lifespan through different pathways supplemented with Astaxanthin. Worms mutated in the *daf-2(e1370)*, *daf-16(mu86)*, *eat-2(ad1116)*, *glp-1(or178)*, *isp-1(qm150)*, *mev-1(kn1)*, *gas-1(fc21)* or *clk-1(e2519)* were fed with *P. marcusii* (produce Astaxanthin, red), *P. marcusii*  $\Delta$ crtB mutant (lacks carotenoids, blue). Nematode survival was calculated with the Kaplan-Meier method (Goel, *et al.* 2010), and differences in survival rates were tested for significance using the log-rank test (Mantel 1966), with appropriate correction for multiple comparisons OASIS-2.

### Figure 3. The Effect of Astaxanthin on isolated plant mitochondria.

**(A)**. Astaxanthin was added at different concentrations (i.e., 0, 9 and 14  $\mu$ M) to crude mitochondria preparations, obtained from *C. elegans*, human and mice. Native organellar complexes were separated by BN-PAGE, followed by Coomassie Blue staining. The position



of complex III, which partially disassembled in the presence of Astaxanthin, is indicated by arrows. **(B)**. The effects of Astaxanthin on various respiratory complexes in cauliflower mitochondria was analyzed by BN-PAGE assays. **(C)** Increasing amounts of Astaxanthin (as indicated in the gel) were added to isolated mitochondria of cauliflower. Arrows indicate to native complexes I, III and V. The effects of Astaxanthin on CIII was analyzed by western-blot analysis with antibodies raised against plant-specific RISP (Rieske iron sulfur) protein. The blots indicate that Astaxanthin cause a reduction in the levels of the holo-complex III and supercomplex I+III, and to the appearance of protein-bands of lower molecular-masses.

**Figure 4. Changes in the mitochondria RISC complex of *C. elegans* grown on bacteria expressing Astaxanthin.** **(A)**. Western-blot analysis of crude mitochondria obtained from wild-type *C. elegans* at different concentrations, *C. elegans* fed with Astaxanthin (+Asta), and *C. elegans isp-1* mutant-line. Antibodies against NUF5 (a subunit of the mitochondrial NADH dehydrogenase (ubiquinol) of the mitochondrial complex I (ortholog in *C. elegans* is termed as C25H3.9), Rieske iron sulphur protein (ISP-1) subunit of the mitochondrial complex III, COX1 (cytochrome c oxidase subunit 1) of the mitochondrial complex IV (the ortholog in *C. elegans* is termed as CTC-1), ATP5A (ATP synthase subunit alpha subunit) of mitochondrial complex V (the orthologue in *C. elegans* is ATP-5), and Cyt C (cytochrome c reductase; the ortholog in *C. elegans* is CYC-1), were used in immunoblotting assays. **(B)**. SDS-PAGE followed by Coomassie staining of isolated mitochondria from *C. elegans* fed with Astaxanthin (+Asta). Controls included crude mitochondria isolated from wild-type *C. elegans* that were not fed with Astaxanthin, and mitochondria isolated from the *C. elegans isp-1* mutant-line.

**Figure 5. Respiration activities in *C. elegans* wild-type and *isp-1* mutants fed with Astaxanthin.** O<sub>2</sub>-uptake rates of wild-type, Astaxanthin-fed animals and *isp-1* mutants were analyzed with a Clark-type electrode as described previously (Cohen, *et al.* 2014). For each assay, equal amounts of dense packed worms from 5 different plates were submerged in 2.25 mL M9 buffer and applied to the electrode in a sealed glass chamber in the dark. O<sub>2</sub>-uptake rates were measured in the absence (Control) or in presence of rotenone (+ROT, 50 μM), Antimycin A (Anti A, 50 μM) and KCN (1 mM) which inhibit complexes I, III and IV activities (respectively). The values are means of four biological replicates. Error bars indicate one standard deviation.

## Supplementary data

**Table S1.** Carotenoid composition in bacterial strains used in this work.

**Table S2.** List of antibodies used for the analysis of astaxanthin effects on *C. elegans* lifespan.

**Table S3.** Mass-spectrometry (MS) of the ~500 kDa (higher) and ~350 kDa (lower) particles in human mitochondria treated with Astaxanthin. Peptides highlighted with orange color indicate to CI subunits, in blue CII subunits, in red CIII subunits, in green CIV subunits, in yellow CV (i.e., ATP-synthase).

**Table S4.** Mass-spectrometry (MS) of the ~500 kDa (higher) and ~350 kDa (lower) particles in cauliflower mitochondria treated with Astaxanthin. Peptides highlighted with orange color indicate to CI subunits, in blue CII subunits, in red CIII subunits, in green CIV subunits, in yellow CV (i.e., ATP-synthase).

**Figure S1. Chemical structures of the carotenoids Zeaxanthin and Astaxanthin compared with ubiquinone.**

Molecular structures of Zeaxanthin and Astaxanthin as well as ubiquinone.

**Figure S2. Lifespan of *C. elegans* fed with Zeaxanthin.**

A survival curve of nematodes supplemented with zeaxanthin in different stages of the development. About 75 animals were fed with *P. marcusii* bacteria that produce zeaxanthin (red), control *P. marcusii* bacteria (blue) or control *E. coli* OP50 bacteria (green). Animal survival was calculated with the Kaplan-Meier method, and survival differences were tested for significance using the log-rank test compared with the control. The mean lifespans (in days) of the different groups were  $18.32 \pm 0.53$ ,  $23.43 \pm 0.57$  and  $16.29 \pm 0.73$ , respectively. Lifespan curves were analyzed by plotting Kaplan-Meier survival curves (Goel, *et al.* 2010). Mean lifespan data was compared using Log-rank test (Mantel 1966) with appropriate correction for multiple comparisons OASIS-2.

**Figure S3. Astaxanthin effect on the median lifespan at the adult stage.**

A survival curve of nematodes supplemented with Astaxanthin in different stages of the development. About 75 animals were used in the experiment. Worms were fed with *Paracoccus marcusii* with no carotenoids expression from the embryo stage until L4 stage, and from L4 stage until their death with *P. marcusii* which produce Astaxanthin (blue), another group of

worms were fed from the embryo stage until L4 stage with *P. marcusii* which produce Astaxanthin, and from L4 stage until their death with P.M. with no carotenoids expression (red). The two control groups included (i) worms which were fed from the embryo stage until their death, with *P. marcusii* with Astaxanthin (green); (ii) worms which were fed from the embryo stage until their death with *P. marcusii* with no carotenoids expression (purple). *C. elegans* survival was calculated with the Kaplan-Meier method, and survival differences were tested for significance using the log rank test compared to the control. The mean lifespans (in days) of the groups given *P. marcusii* with no carotenoids expression during development and *P. marcusii* with Astaxanthin during adulthood, *P. marcusii* with Astaxanthin during development and *P. marcusii* with no carotenoids expression during adulthood, *P. marcusii* with Astaxanthin during all their lives and *P. marcusii* with no carotenoids expression during all their lives were  $19.87 \pm 0.48$ ,  $17.95 \pm 0.57$ ,  $20.18 \pm 0.55$  and  $18.22 \pm 0.49$ , respectively. Lifespan curves were analyzed by plotting Kaplan-Meier survival curves (Goel, *et al.* 2010). Mean lifespan data was compared using Log-rank test (Mantel 1966) with appropriate correction for multiple comparisons OASIS-2.

**Figure S4. Astaxanthin from *P. marcusii* is absorbed by *C. elegans* cells.**

(A). Stereo microscope photograph of Astaxanthin-fed animals. *C. elegans* fed with *P. marcusii* expressing Astaxanthin from the embryo stage for 5 days (left panel). After 5 days the worms were fed with *E. coli* bacteria for 24 hours, in order to wash their intestines (middle panel). The control worms were fed just with *E. coli* bacteria (right panel). (B). Quantification of Astaxanthin in *P. marcusii* and in *E. coli* cells by HPLC. The amount of Astaxanthin is shown as microgram per gram dry weight ( $\mu\text{g/gDW}$ ). Stereomicroscope images of Astaxanthin-fed animals. *C. elegans* were fed with *P. marcusii* containing Astaxanthin (left and middle panels) or control *P. marcusii* (left panel) from the embryo stage until adulthood. Then one group of worms were fed with *E. coli* for 24 hours, which cleans their intestine (middle panel).

**Figure S5. Accumulation of respiratory complexes in *C. elegans* mitochondria treated with astaxanthin.**

(A). Crude mitochondria were obtained from *C. elegans* grown in the absence (-) and presence of *P. marcusii*. Mitochondrial complexes were separated by BN-PAGE. (B). Crude mitochondria obtained from *C. elegans* were treated in absence (-) or presence (+) of Astaxanthin (10  $\mu\text{M}$ ), Lycopene (5 and 10  $\mu\text{M}$ ), and Zeaxanthin (5 and 10  $\mu\text{M}$ ), and then

separated by BN-PAGE. The positions of the holo-complex III dimer (CIII<sub>2</sub>) and sub-CIII (CIII\*) particles are indicated by arrows.

**Figure S6. Accumulation of respiratory complexes in cauliflower mitochondria treated with different concentrations of Astaxanthin.**

Astaxanthin, at various concentrations (as indicated in the blots), was added to cauliflower mitochondria. The mitochondrial complexes were then separated by BN-PAGE, and the gel was stained by Coomassie brilliant blue. Antibodies raised against CA2 (Carbonic anhydrase subunit 2) and ATPA (ATP synthase subunit alpha) were used to assay the levels and integrity of the organellar complexes. The positions of the native CI (~1,000 kDa), CV (about 600 kDa) and supercomplex I+III are indicated.

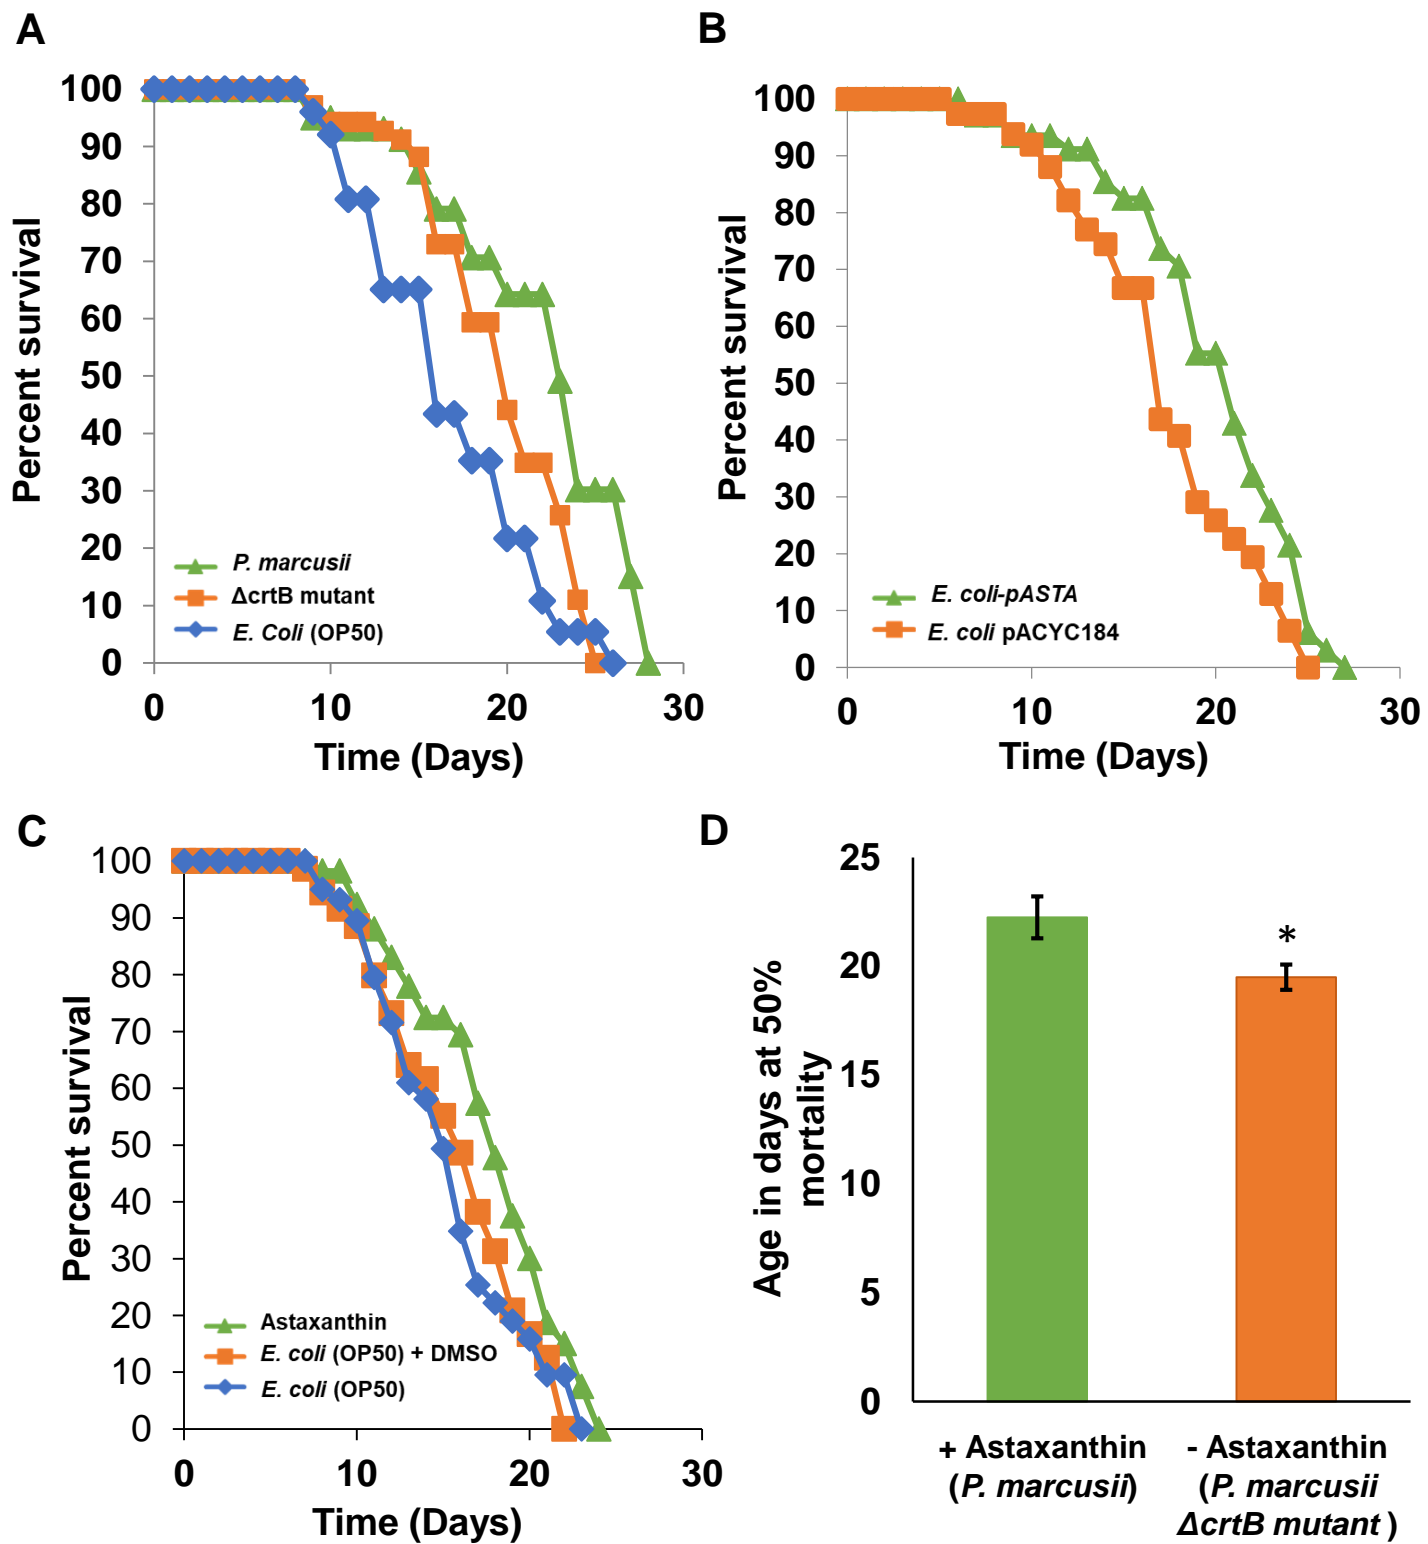

Figure 1

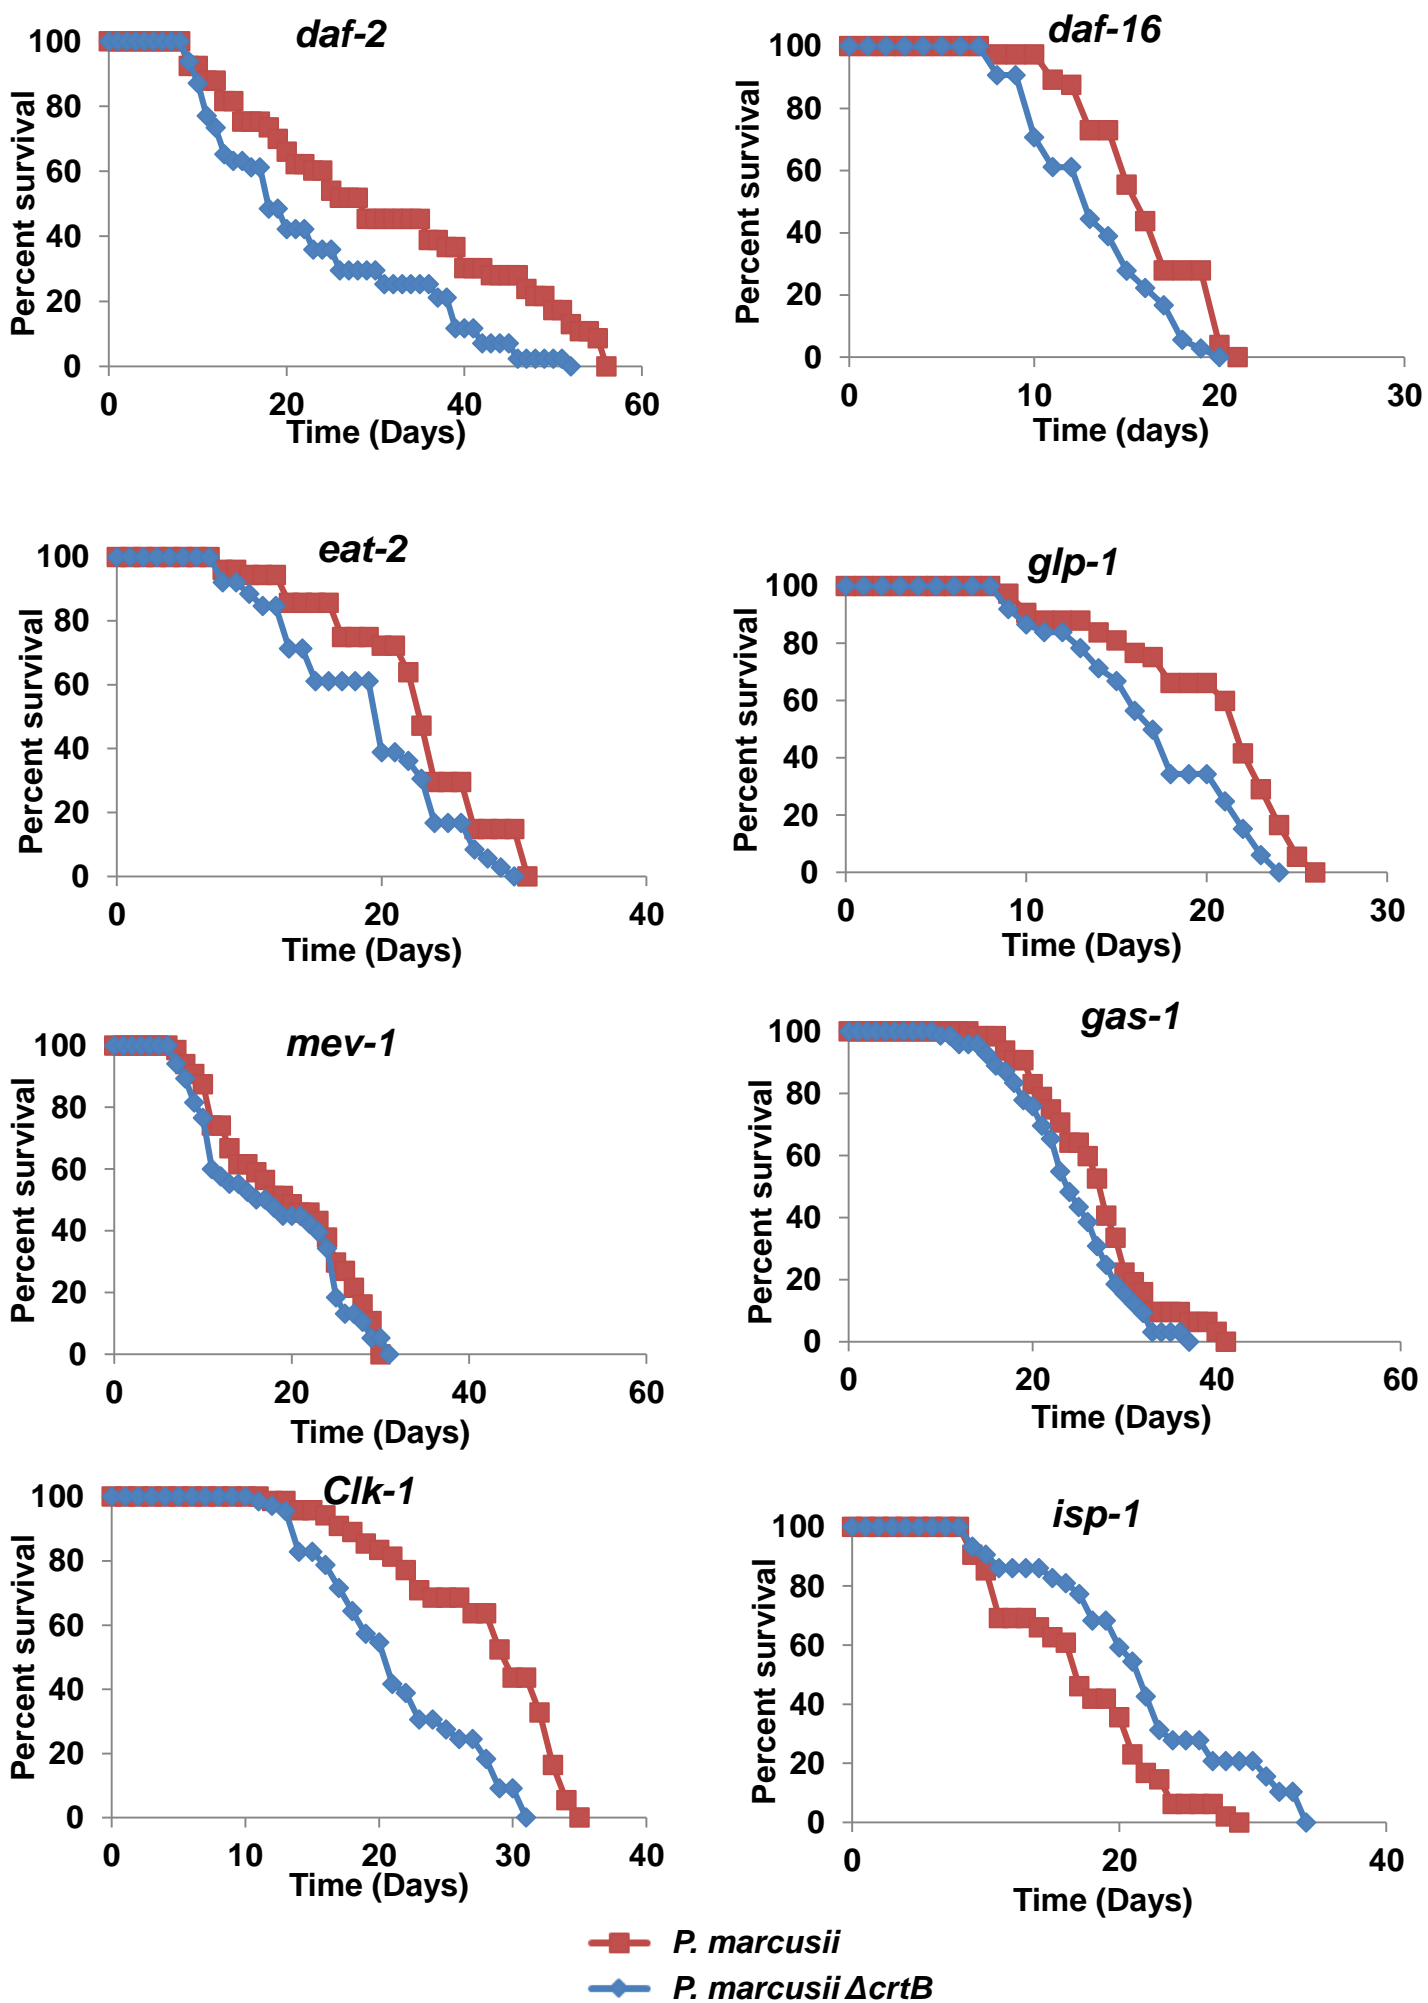

Figure 2

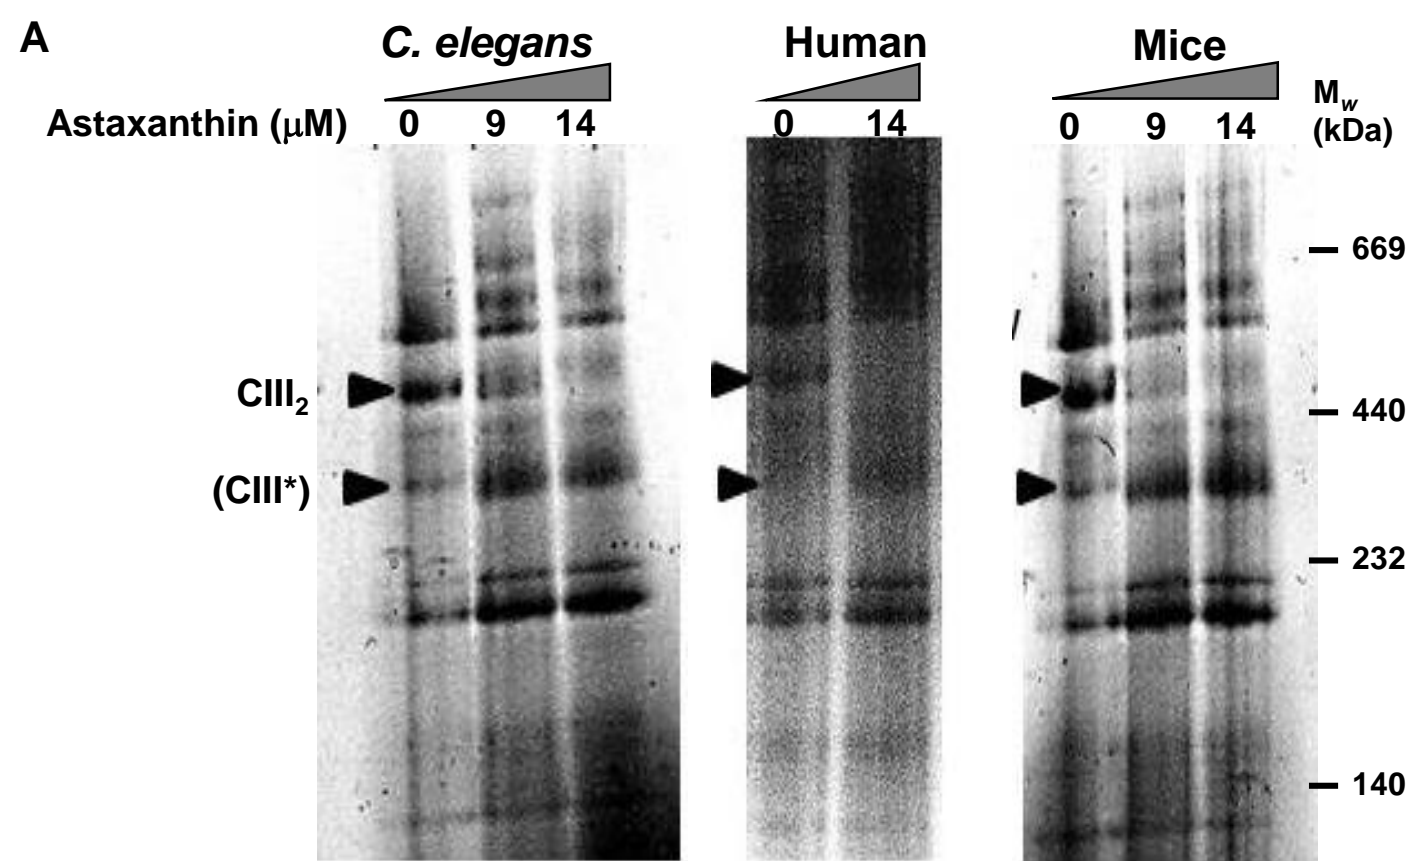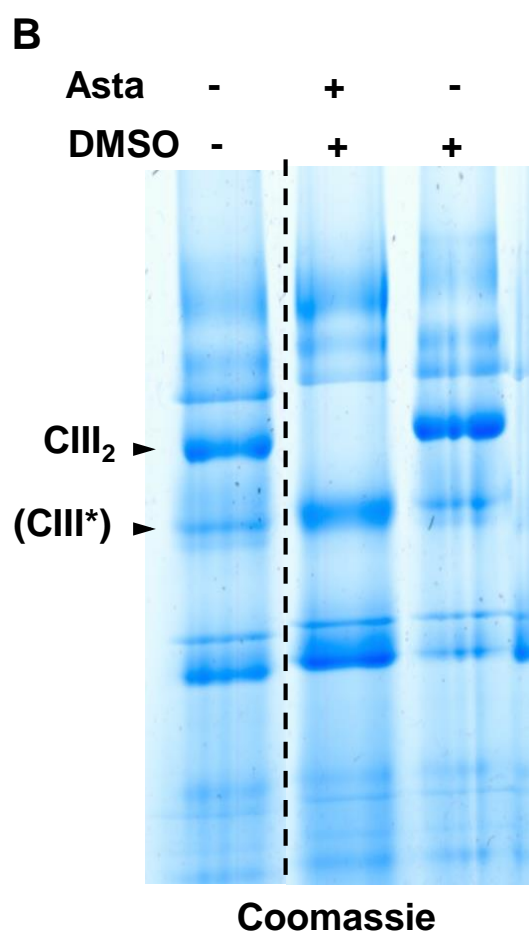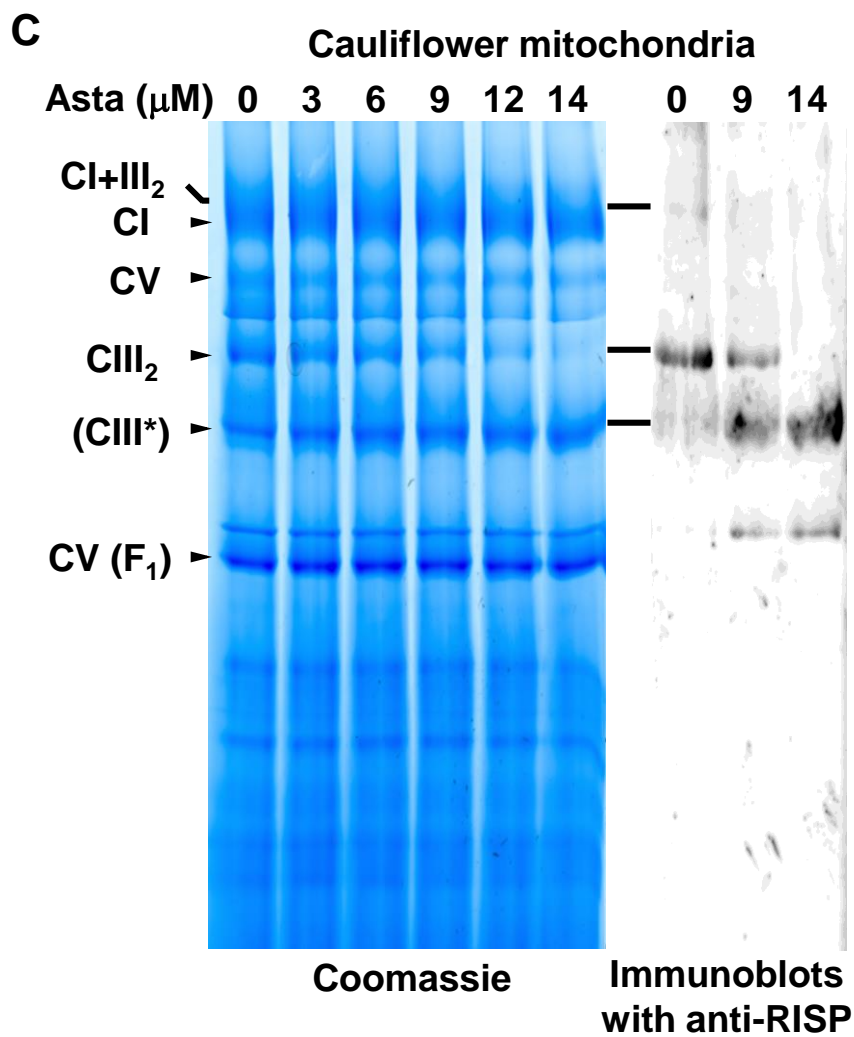

Figure 3

**A**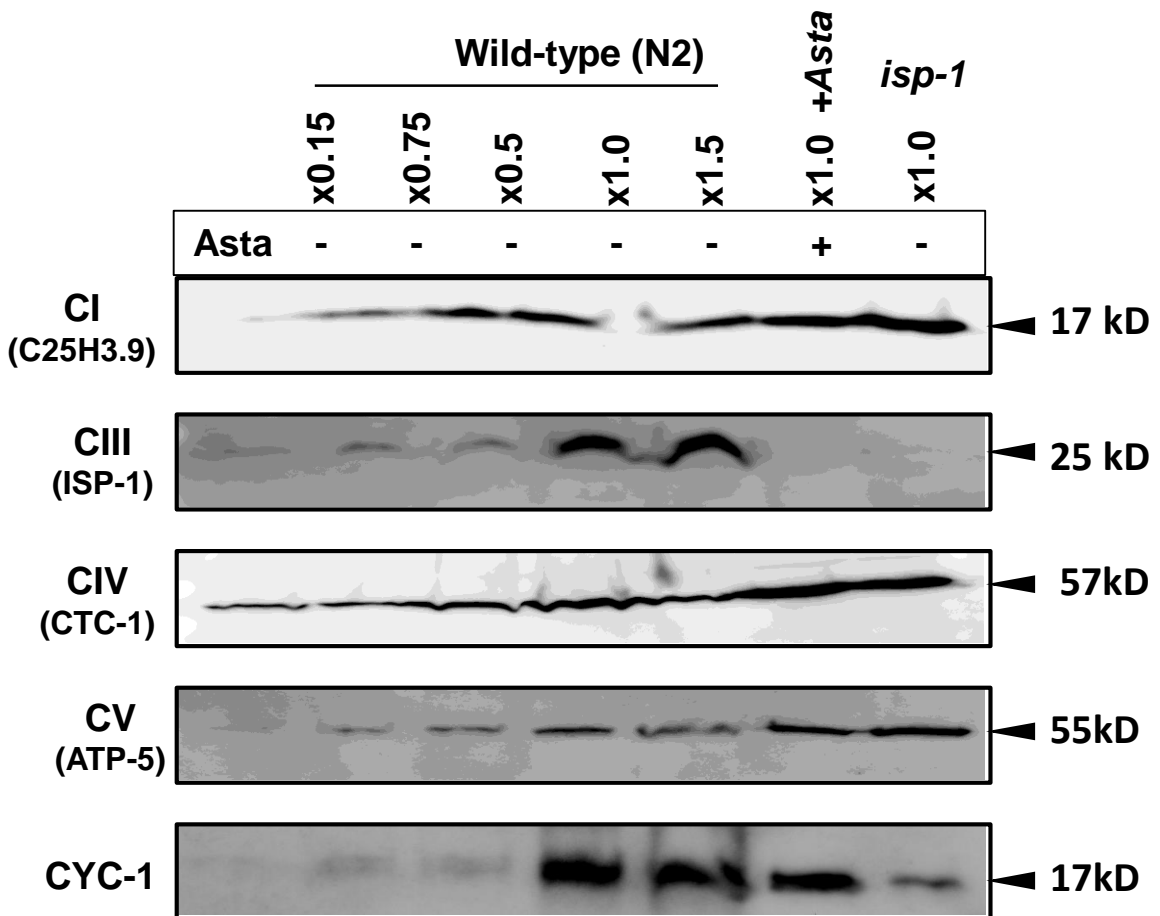**B**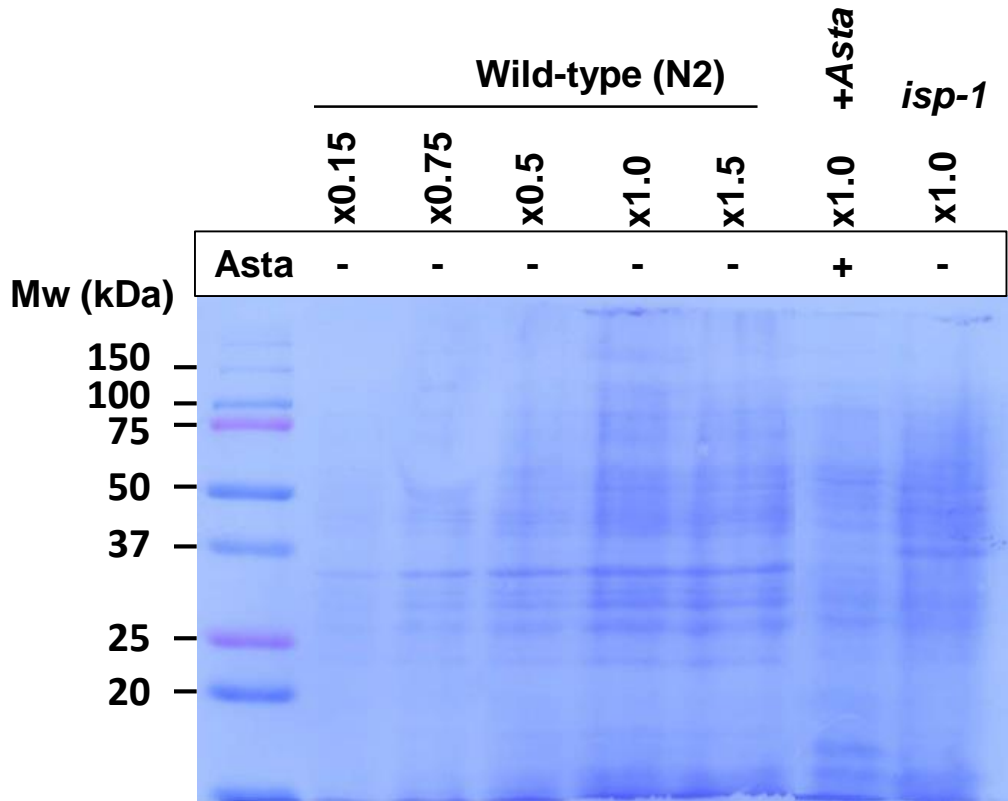

Figure 4



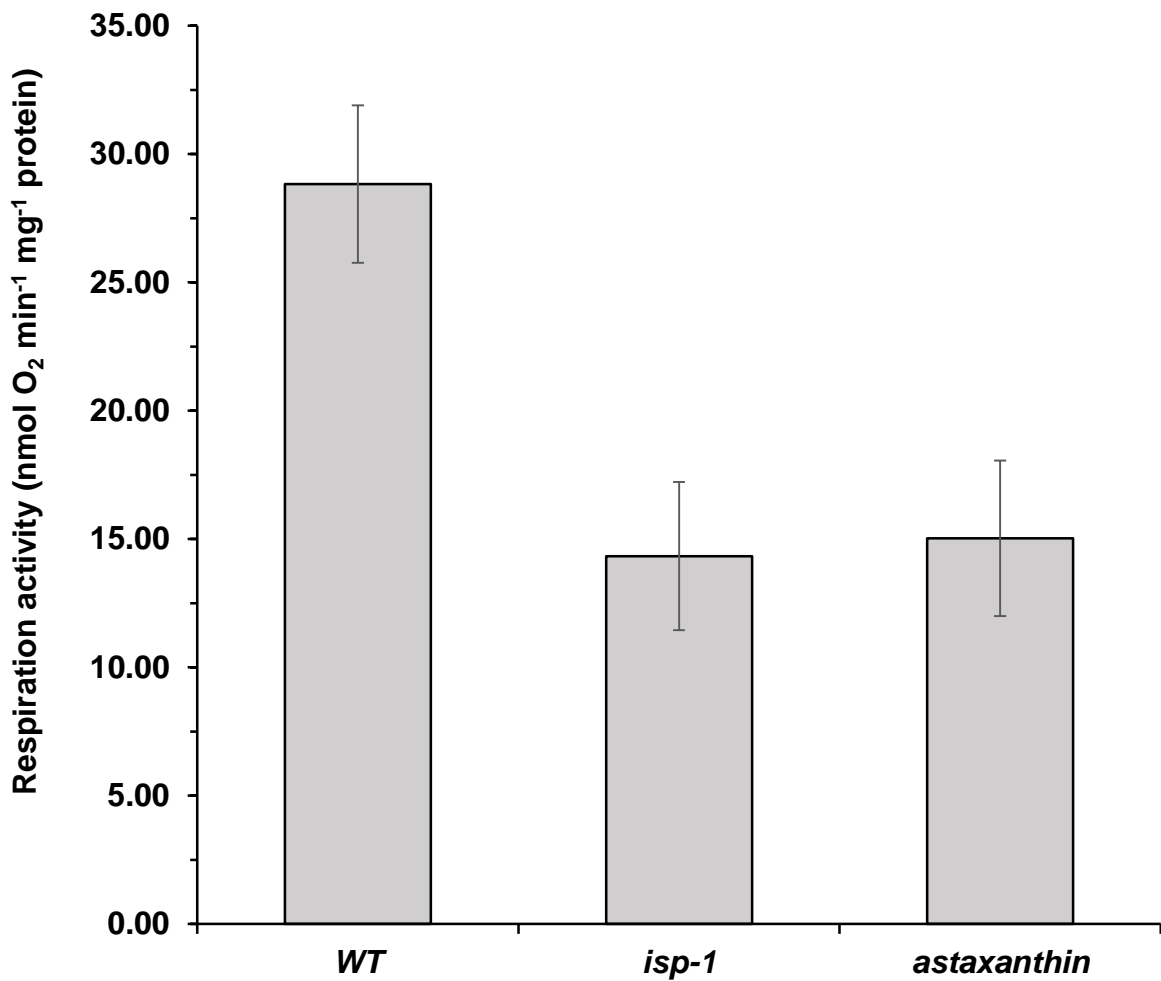

|              | Respiration  | % of inhibition |              |              |
|--------------|--------------|-----------------|--------------|--------------|
|              | Mock         | ROT (50 μM)     | Anti-A       | KCN (1 mM)   |
| WT           | 28.83 ± 3.07 | 55.17 ± 2.95    | 66.17 ± 0.70 | 85.71 ± 5.18 |
| <i>isp-1</i> | 14.33 ± 2.88 | 34.17 ± 1.33    | 34.71 ± 0.99 | 95.22 ± 0.19 |
| astaxanthin  | 15.03 ± 3.03 | 39.09 ± 1.44    | 40.20 ± 0.84 | 90.05 ± 2.35 |

Figure 5

**Zeaxanthin**

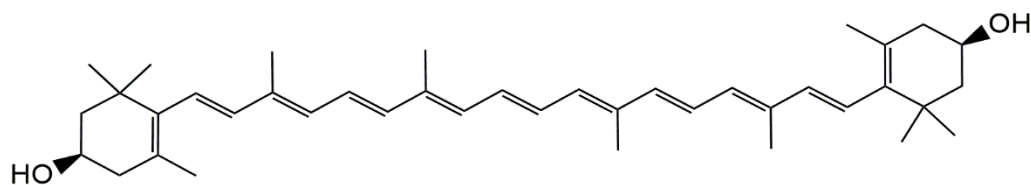

**Astaxanthin**

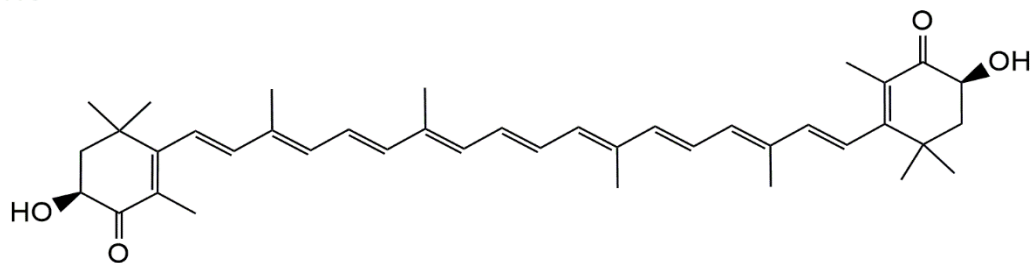

**Ubiquinone**

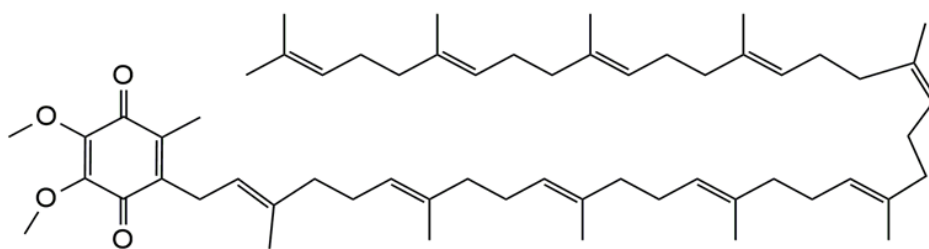

**Supplementary Figure S1. Chemical structures of the carotenoids Zeaxanthin and Astaxanthin compared with ubiquinone.**

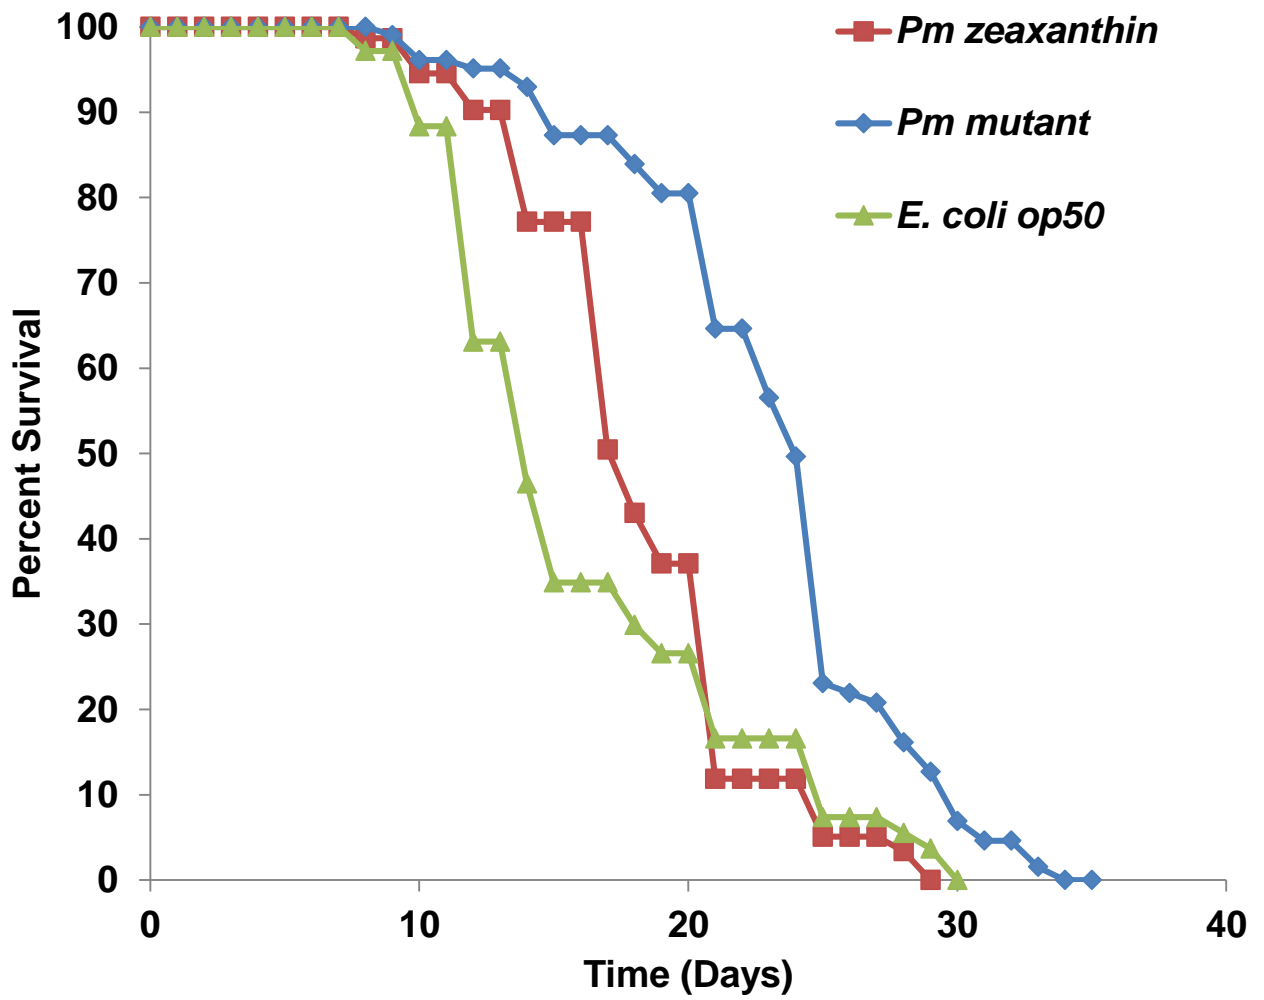

Supplementary Figure S2. Lifespan of *C. elegans* fed with Zeaxanthin.

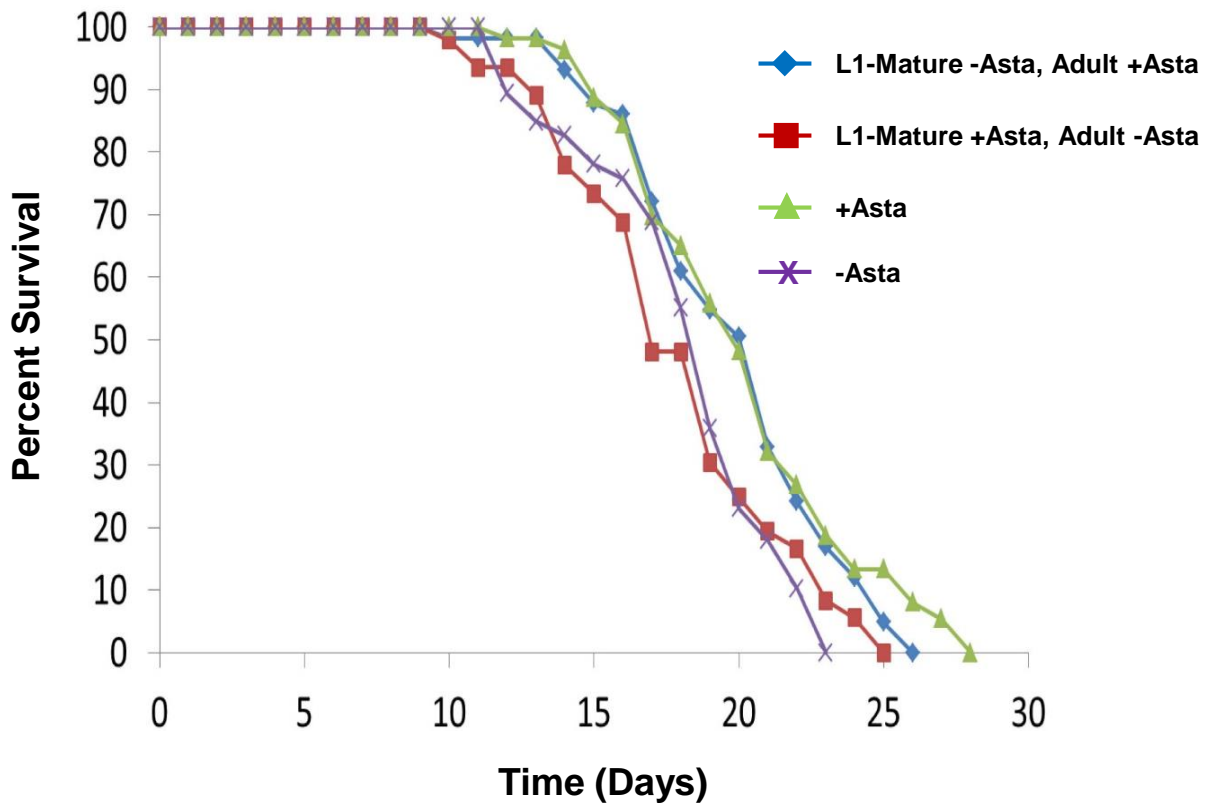

Supplementary Figure S3. Astaxanthin effect on the median lifespan at the adult stage.

**A**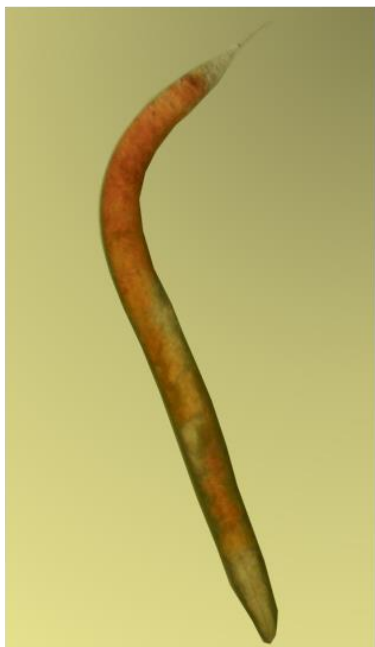

*C. elegans* fed with  
*P. marcusii*

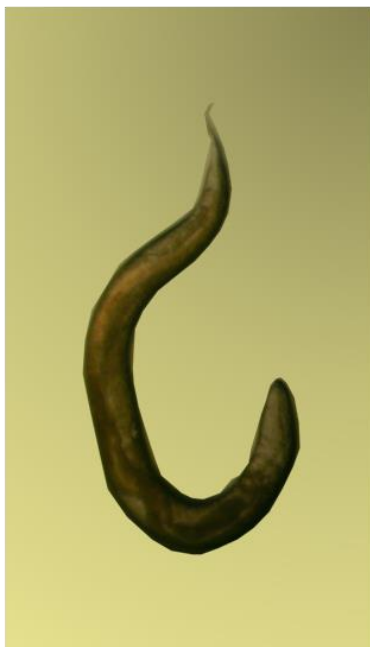

*C. elegans* after  
intestine cleaning

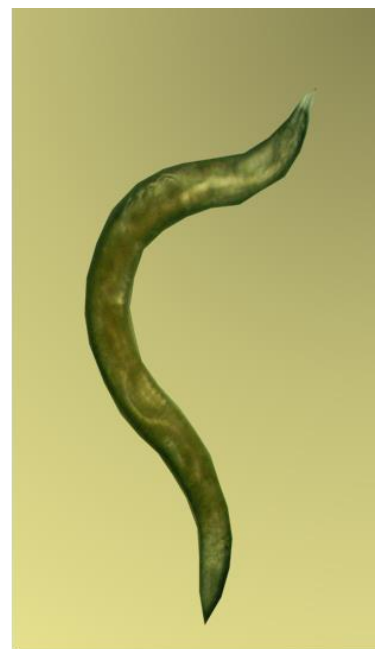

*C. elegans*  
(control)

**B**

### HPLC quantitative analysis of astaxanthin in bacteria

| Sample                    | Mass of sample (mg) | Amount of astaxanthin ( $\mu\text{g/gDW}$ ) |
|---------------------------|---------------------|---------------------------------------------|
| <i>E.coli</i> + Asta      | 0.311               | 146.3066                                    |
| <i>P. marcusii</i> + Asta | 0.422               | 715.9167                                    |

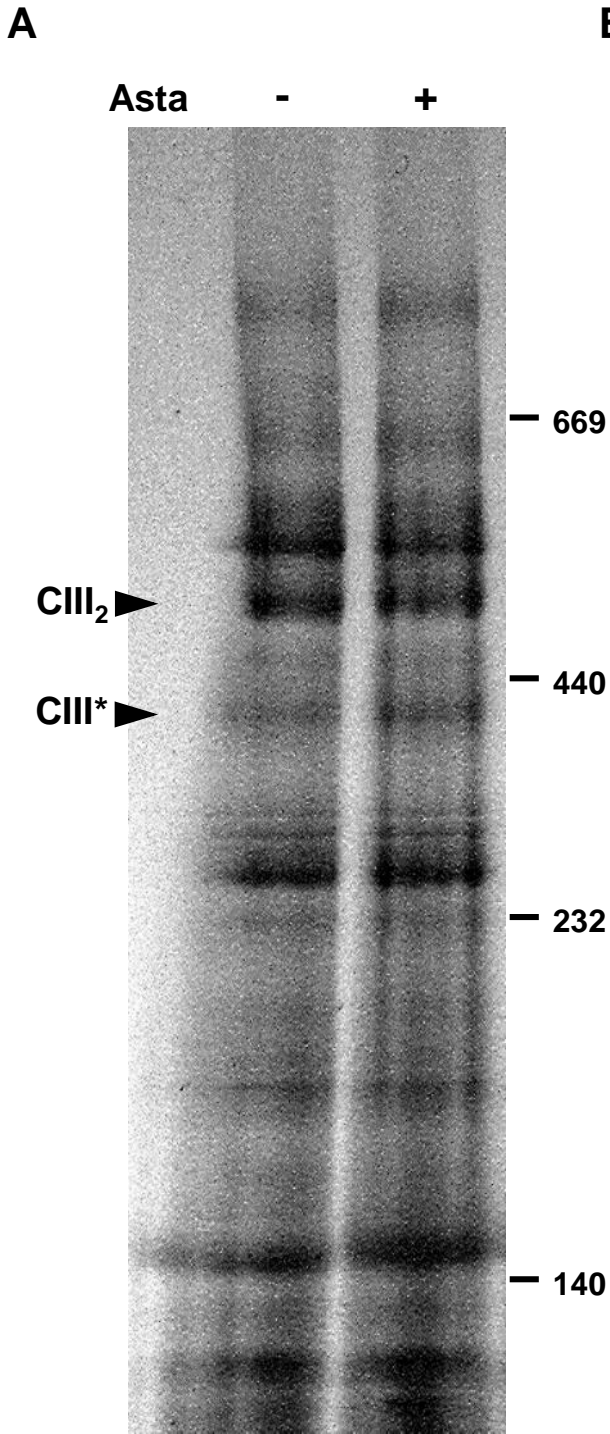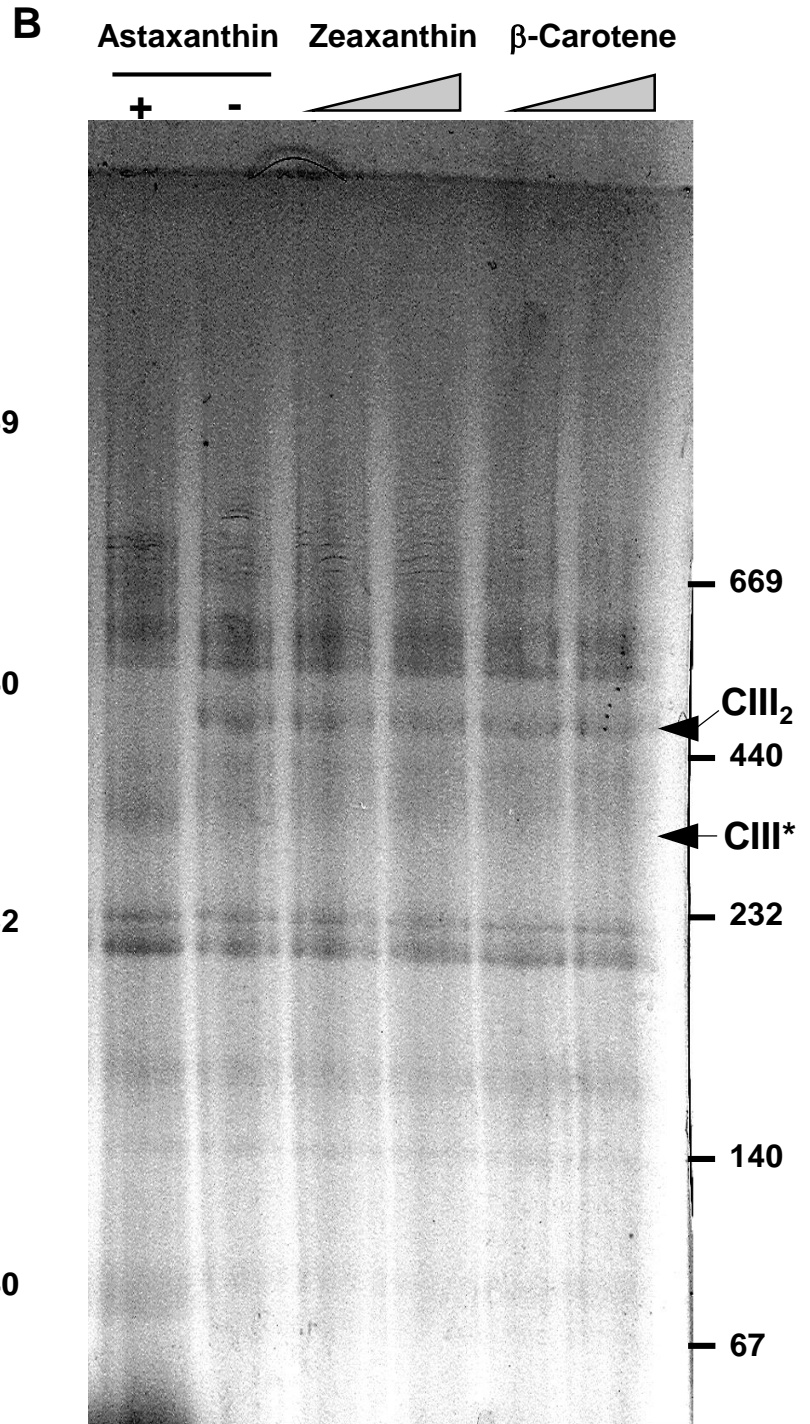

Supplemental Figure S5. Accumulation of respiratory complexes in *C. elegans* mitochondria treated with Astaxanthin, Lycopene and Zeaxanthin.

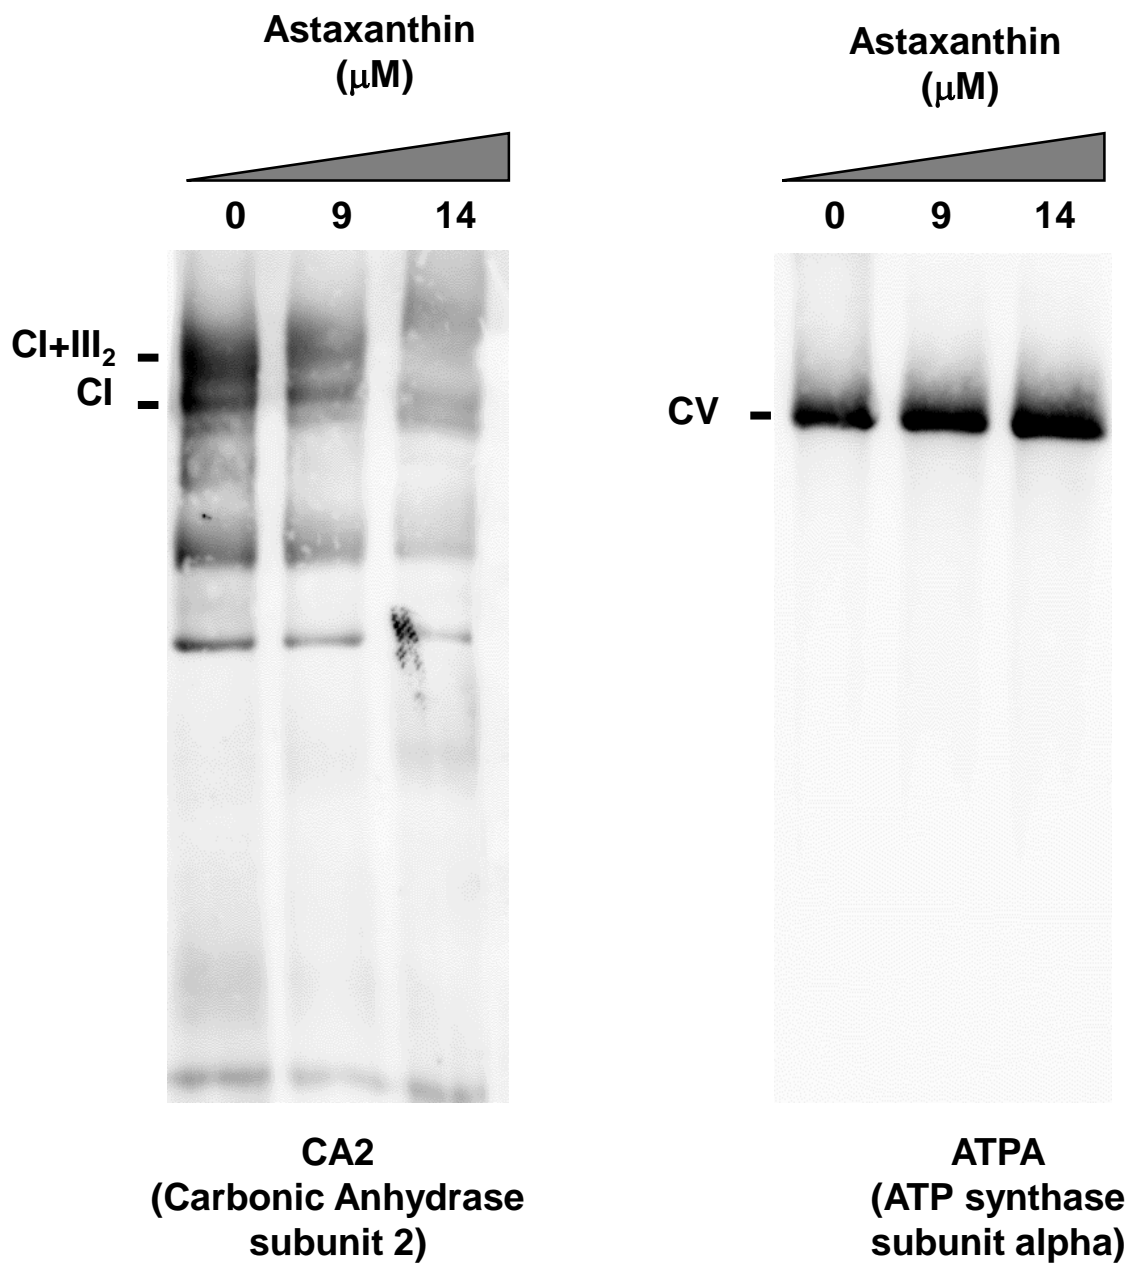

**Supplemental Figure S6. Accumulation of respiratory complexes in cauliflower mitochondria treated with different concentrations of astaxanthin.**

### Supplementary Table S1. Carotenoid composition in bacterial strains used in this work

| Name                                                           | Carotenoid composition                                                              |
|----------------------------------------------------------------|-------------------------------------------------------------------------------------|
| <i>Escherichia coli</i> WT                                     | None                                                                                |
| <i>E. coli</i> pASTA                                           | Astaxanthin                                                                         |
| <i>E. coli</i> pACYC184                                        | None                                                                                |
| <i>Paracoccus marcusii</i><br>( <i>P. marcusii</i> ) wild-type | Largely Astaxanthin<br>Minor: Phoenicoxanthin Adonixanthin,<br>3'-Hydroxyechinenone |
| <i>P. marcusii</i> $\Delta$ crtB                               | None                                                                                |
| <i>P. marcusii</i> $\Delta$ crtW                               | Zeaxanthin                                                                          |
| <i>P. marcusii</i> $\Delta$ crtY                               | Lycopene                                                                            |



**Supplementary Table S2. List of antibodies used for the analysis of astaxanthin effects on *C. elegans* lifespan.**

| <b>Antibody</b> | <b>Protein I.D.</b>                                          | <b>origin</b>                 | <b>serum</b>        | <b>dilution</b> | <b>Reference / source</b>                                   |
|-----------------|--------------------------------------------------------------|-------------------------------|---------------------|-----------------|-------------------------------------------------------------|
| Atp-A           | Mitochondrial ATP-synthase subunit $\alpha$                  | <i>Zea mays</i>               | Mouse (monoclonal)  | 1/5,000         | (Michael <i>et al.</i> 1993)                                |
| ATP-5           | ATP synthase subunit, mitochondrial                          | <i>Caenorhabditis elegans</i> | Rabbit (polyclonal) | 1/1,000         | Thermo Fisher Scientific                                    |
| C25H3           | Uncharacterized protein, mitochondrial respiratory complex I | <i>Caenorhabditis elegans</i> | Rabbit (polyclonal) | 1/1,000         | Sigma-Aldrich Co. LLC                                       |
| CA2             | $\gamma$ -carbonic anhydrase-like subunit 2                  | <i>Arabidopsis thaliana</i>   | Rabbit (polyclonal) | 1/1,000         | (Perales <i>et al.</i> 2005, Sunderhaus <i>et al.</i> 2006) |
| CTC-1           | Cytochrome c oxidase subunit 1, complex IV, mitochondrial    | <i>Caenorhabditis elegans</i> | Mouse (monoclonal)  | 1/1,000         | Thermo Fisher Scientific                                    |
| CYC-1           | Cytochrome C, mitochondrial                                  | <i>Caenorhabditis elegans</i> | Rabbit (polyclonal) | 1/1,000         | Schagger H.H. et al. (2002)                                 |
| ISP-1           | Cytochrome b-c1 complex subunit Rieske, mitochondrial        | <i>Caenorhabditis elegans</i> | Mouse (monoclonal)  | 1/1,000         | Thermo Fisher Scientific                                    |
| RISP            | Rieske iron-sulfur protein                                   | <i>Arabidopsis thaliana</i>   | Rabbit (polyclonal) | 1/5,000         | Gift of Prof. Ian Small, UWA                                |



1  
2  
3  
4  
5  
6  
7  
8  
9  
10  
11  
12  
13  
14  
15  
16  
17  
18  
19  
20  
21  
22  
23  
24  
25  
26  
27  
28  
29  
30  
31  
32  
33  
34  
35  
36  
37  
38  
39  
40  
41  
42  
43  
44  
45  
46  
47  
48  
49  
50  
51  
52  
53  
54  
55  
56  
57  
58  
59  
60  
61  
62  
63  
64  
65  
66  
67  
68  
69  
70  
71  
72  
73  
74  
75  
76  
77  
78  
79  
80  
81  
82  
83  
84  
85  
86  
87  
88  
89  
90  
91  
92  
93  
94  
95  
96  
97  
98  
99  
100  
101  
102  
103  
104  
105  
106  
107  
108  
109  
110  
111  
112  
113  
114  
115  
116  
117  
118  
119  
120  
121  
122  
123  
124  
125  
126  
127  
128  
129  
130  
131  
132  
133  
134  
135  
136  
137  
138  
139  
140  
141  
142  
143  
144  
145  
146  
147  
148  
149  
150  
151  
152  
153  
154  
155  
156  
157  
158  
159  
160  
161  
162  
163  
164  
165  
166  
167  
168  
169  
170  
171  
172  
173  
174  
175  
176  
177  
178  
179  
180  
181  
182  
183  
184  
185  
186  
187  
188  
189  
190  
191  
192  
193  
194  
195  
196  
197  
198  
199  
200  
201  
202  
203  
204  
205  
206  
207  
208  
209  
210  
211  
212  
213  
214  
215  
216  
217  
218  
219  
220  
221  
222  
223  
224  
225  
226  
227  
228  
229  
230  
231  
232  
233  
234  
235  
236  
237  
238  
239  
240  
241  
242  
243  
244  
245  
246  
247  
248  
249  
250  
251  
252  
253  
254  
255  
256  
257  
258  
259  
260  
261  
262  
263  
264  
265  
266  
267  
268  
269  
270  
271  
272  
273  
274  
275  
276  
277  
278  
279  
280  
281  
282  
283  
284  
285  
286  
287  
288  
289  
290  
291  
292  
293  
294  
295  
296  
297  
298  
299  
300  
301  
302  
303  
304  
305  
306  
307  
308  
309  
310  
311  
312  
313  
314  
315  
316  
317  
318  
319  
320  
321  
322  
323  
324  
325  
326  
327  
328  
329  
330  
331  
332  
333  
334  
335  
336  
337  
338  
339  
340  
341  
342  
343  
344  
345  
346  
347  
348  
349  
350  
351  
352  
353  
354  
355  
356  
357  
358  
359  
360  
361  
362  
363  
364  
365  
366  
367  
368  
369  
370  
371  
372  
373  
374  
375  
376  
377  
378  
379  
380  
381  
382  
383  
384  
385  
386  
387  
388  
389  
390  
391  
392  
393  
394  
395  
396  
397  
398  
399  
400  
401  
402  
403  
404  
405  
406  
407  
408  
409  
410  
411  
412  
413  
414  
415  
416  
417  
418  
419  
420  
421  
422  
423  
424  
425  
426  
427  
428  
429  
430  
431  
432  
433  
434  
435  
436  
437  
438  
439  
440  
441  
442  
443  
444  
445  
446  
447  
448  
449  
450  
451  
452  
453  
454  
455  
456  
457  
458  
459  
460  
461  
462  
463  
464  
465  
466  
467  
468  
469  
470  
471  
472  
473  
474  
475  
476  
477  
478  
479  
480  
481  
482  
483  
484  
485  
486  
487  
488  
489  
490  
491  
492  
493  
494  
495  
496  
497  
498  
499  
500  
501  
502  
503  
504  
505  
506  
507  
508  
509  
510  
511  
512  
513  
514  
515  
516  
517  
518  
519  
520  
521  
522  
523  
524  
525  
526  
527  
528  
529  
530  
531  
532  
533  
534  
535  
536  
537  
538  
539  
540  
541  
542  
543  
544  
545  
546  
547  
548  
549  
550  
551  
552  
553  
554  
555  
556  
557  
558  
559  
560  
561  
562  
563  
564  
565  
566  
567  
568  
569  
570  
571  
572  
573  
574  
575  
576  
577  
578  
579  
580  
581  
582  
583  
584  
585  
586  
587  
588  
589  
590  
591  
592  
593  
594  
595  
596  
597  
598  
599  
600  
601  
602  
603  
604  
605  
606  
607  
608  
609  
610  
611  
612  
613  
614  
615  
616  
617  
618  
619  
620  
621  
622  
623  
624  
625  
626  
627  
628  
629  
630  
631  
632  
633  
634  
635  
636  
637  
638  
639  
640  
641  
642  
643  
644  
645  
646  
647  
648  
649  
650  
651  
652  
653  
654  
655  
656  
657  
658  
659  
660  
661  
662  
663  
664  
665  
666  
667  
668  
669  
670  
671  
672  
673  
674  
675  
676  
677  
678  
679  
680  
681  
682  
683  
684  
685  
686  
687  
688  
689  
690  
691  
692  
693  
694  
695  
696  
697  
698  
699  
700  
701  
702  
703  
704  
705  
706  
707  
708  
709  
710  
711  
712  
713  
714  
715  
716  
717  
718  
719  
720  
721  
722  
723  
724  
725  
726  
727  
728  
729  
730  
731  
732  
733  
734  
735  
736  
737  
738  
739  
740  
741  
742  
743  
744  
745  
746  
747  
748  
749  
750  
751  
752  
753  
754  
755  
756  
757  
758  
759  
760  
761  
762  
763  
764  
765  
766  
767  
768  
769  
770  
771  
772  
773  
774  
775  
776  
777  
778  
779  
780  
781  
782  
783  
784  
785  
786  
787  
788  
789  
790  
791  
792  
793  
794  
795  
796  
797  
798  
799  
800  
801  
802  
803  
804  
805  
806  
807  
808  
809  
810  
811  
812  
813  
814  
815  
816  
817  
818  
819  
820  
821  
822  
823  
824  
825  
826  
827  
828  
829  
830  
831  
832  
833  
834  
835  
836  
837  
838  
839  
840  
841  
842  
843  
844  
845  
846  
847  
848  
849  
850  
851  
852  
853  
854  
855  
856  
857  
858  
859  
860  
861  
862  
863  
864  
865  
866  
867  
868  
869  
870  
871  
872  
873  
874  
875  
876  
877  
878  
879  
880  
881  
882  
883  
884  
885  
886  
887  
888  
889  
890  
891  
892  
893  
894  
895  
896  
897  
898  
899  
900  
901  
902  
903  
904  
905  
906  
907  
908  
909  
910  
911  
912  
913  
914  
915  
916  
917  
918  
919  
920  
921  
922  
923  
924  
925  
926  
927  
928  
929  
930  
931  
932  
933  
934  
935  
936  
937  
938  
939  
940  
941  
942  
943  
944  
945  
946  
947  
948  
949  
950  
951  
952  
953  
954  
955  
956  
957  
958  
959  
960  
961  
962  
963  
964  
965  
966  
967  
968  
969  
970  
971  
972  
973  
974  
975  
976  
977  
978  
979  
980  
981  
982  
983  
984  
985  
986  
987  
988  
989  
990  
991  
992  
993  
994  
995  
996  
997  
998  
999  
1000
